# Supplementary material
Source: PubMed Central journal article supplement (PMC8953148)
Supplement: NIHMS1668378-supplement-supp_figure_3.pdf [file NIHMS1668378-supplement-supp_figure_3.pdf]

$\Omega$  z-scored measure of general intelligence

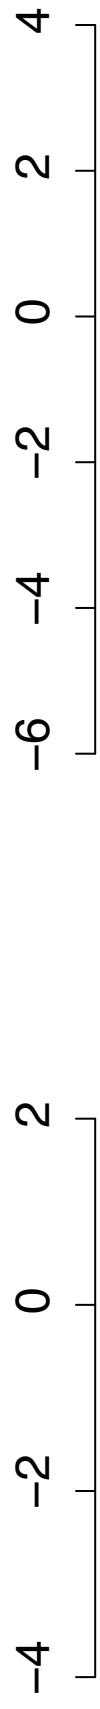

Males

Females

$\Theta$  z-scored measure of general intelligence

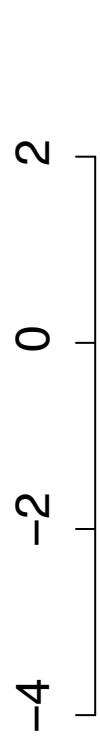

Males

Females

$\Sigma$  z-scored measure of general intelligence adjusted for sex

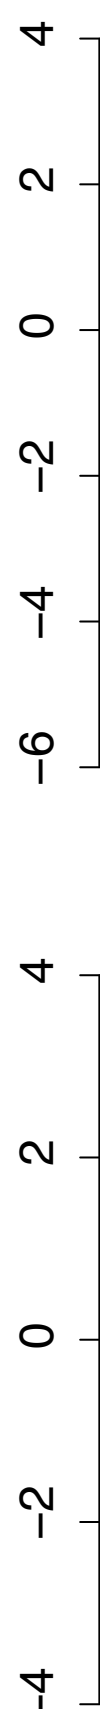

Males

Females

$\Omega$  z-scored measure of general intelligence adjusted for sex

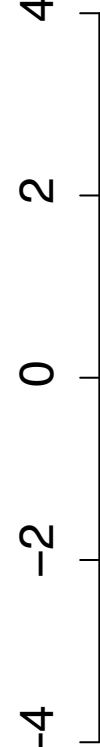

Males

Females
