# Supplementary material
Source: PubMed Central journal article supplement (PMC8953148)

### Model using pLI of all genes

Deletion

Duplication

### Model using pLI of ID and non-ID genes

Deletion of ID genes

Deletion of non ID genes

Duplication of ID genes

Duplication of non ID genes

**Estimate**    **95% CI**

-0.18 [-0.21; -0.14]

-0.05 [-0.07; -0.04]

-1.03 [-1.50; -0.55]

-0.14 [-0.18; -0.11]

-0.65 [-0.99; -0.31]

-0.04 [-0.06; -0.02]

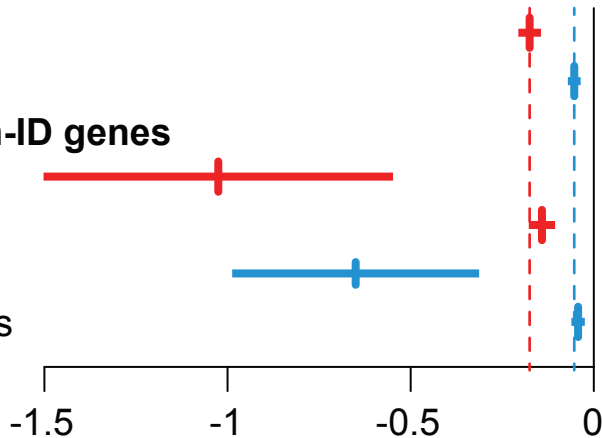

Supplement: NIHMS1668378-supplement-supp_figure_5.pdf [file NIHMS1668378-supplement-supp_figure_5.pdf]
