# Supplementary material
Source: PubMed Central journal article supplement (PMC8953148)

ICC = 0.36 [-0.12;0.7],  $P = 0.10$

- 1 - TAR (Del.)
- 2 - 1q21.1 (Del.)
- 14 - 15q11.2 (Del.)
- 17 - 16p11.2 (Del.)
- 18 - 16p11.2 distal (Del.)
- 19 - 16p13.11 (Del.)
- 20 - 16p12.1 (Del.)
- 25 - 17p12 (Del., *HNPP*)
- 36 - 15q11.2 (Dup.)
- 39 - 16p11.2 (Dup.)
- 41 - 16p13.11 (Dup.)
- 44 - 17q12 (Dup.)
- 47 - 22q11.2 (Dup.)

- Recurrent CNV without ID gene
- Recurrent CNV with ID gene

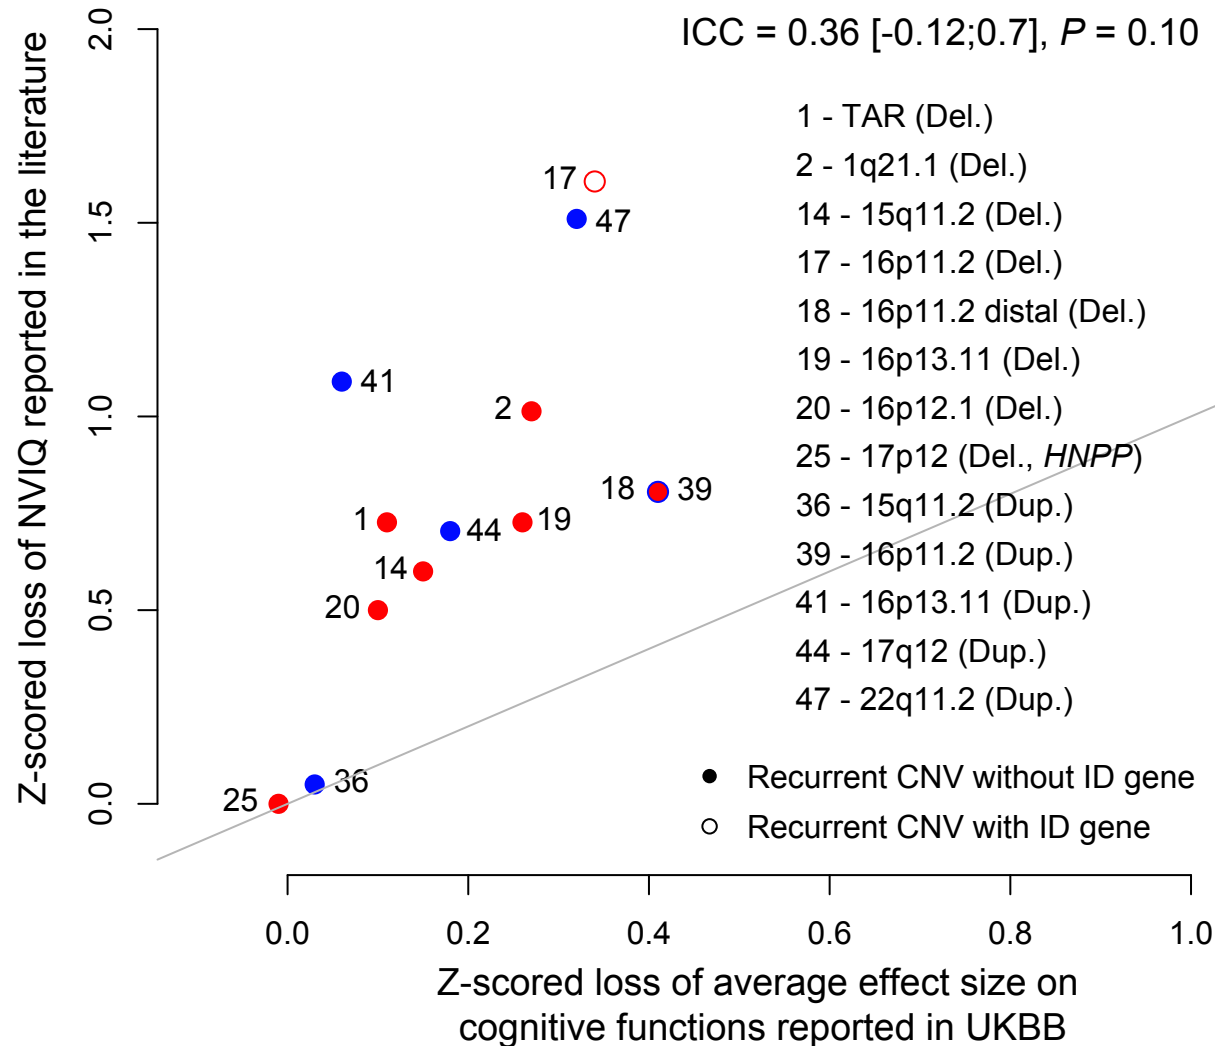

Supplement: NIHMS1668378-supplement-supp_figure_6.pdf [file NIHMS1668378-supplement-supp_figure_6.pdf]
