# Supplementary material
Source: PubMed Central journal article supplement (PMC8953148)

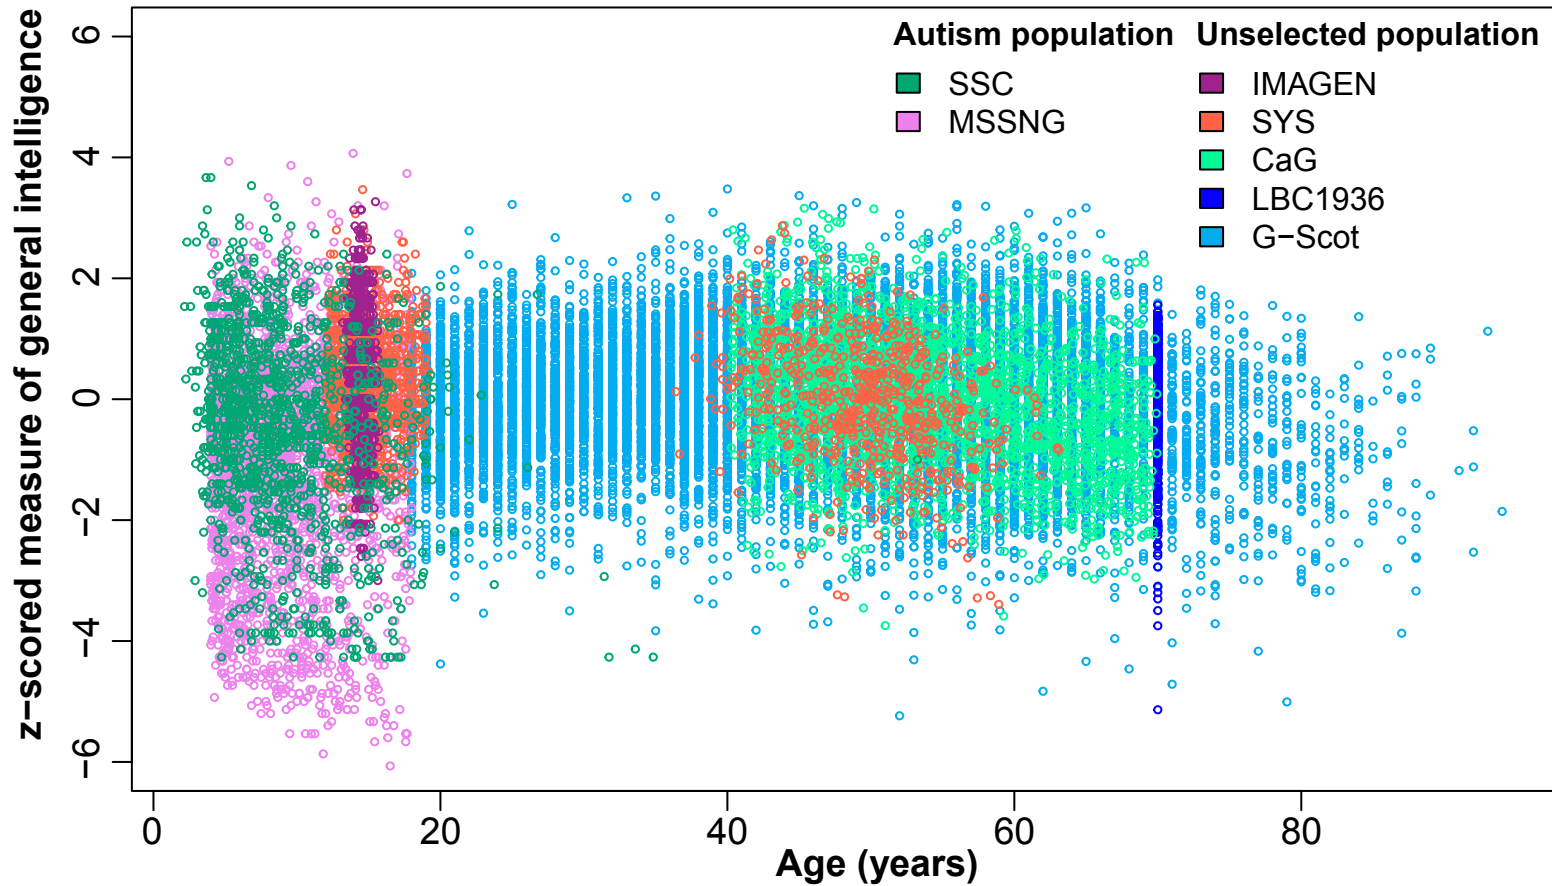

Supplement: NIHMS1668378-supplement-supp_figure_1.pdf [file NIHMS1668378-supplement-supp_figure_1.pdf]

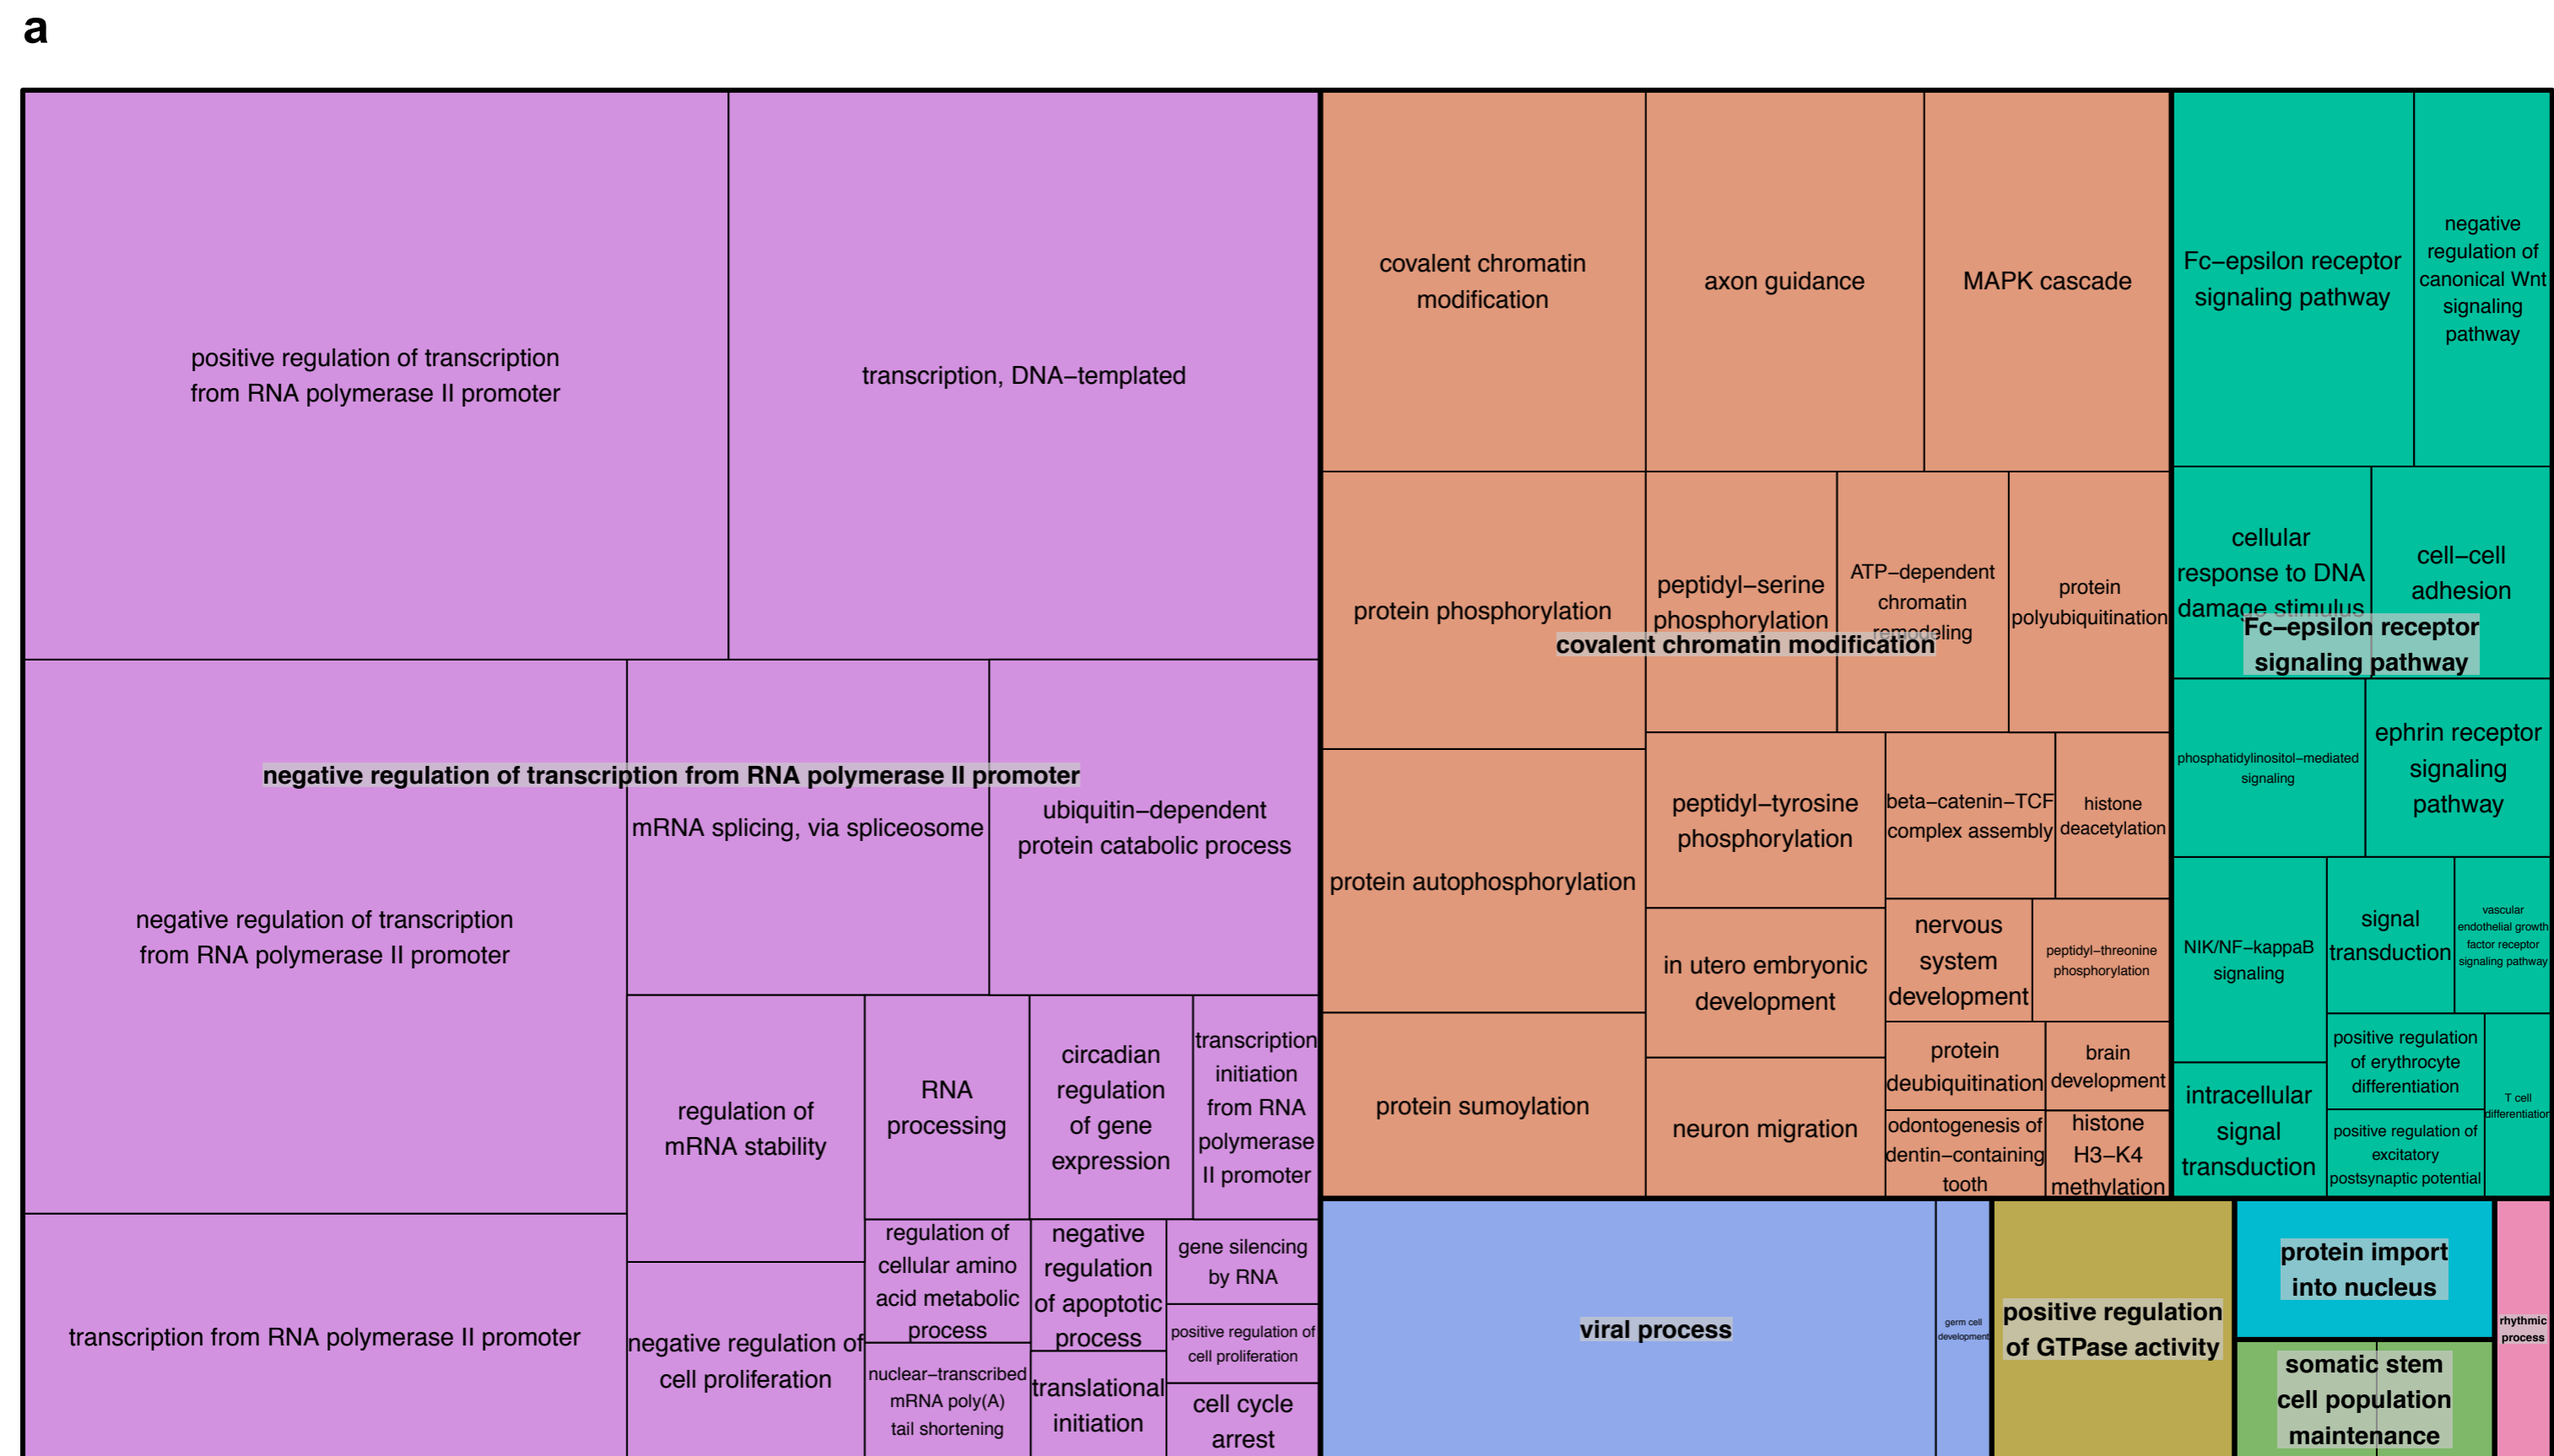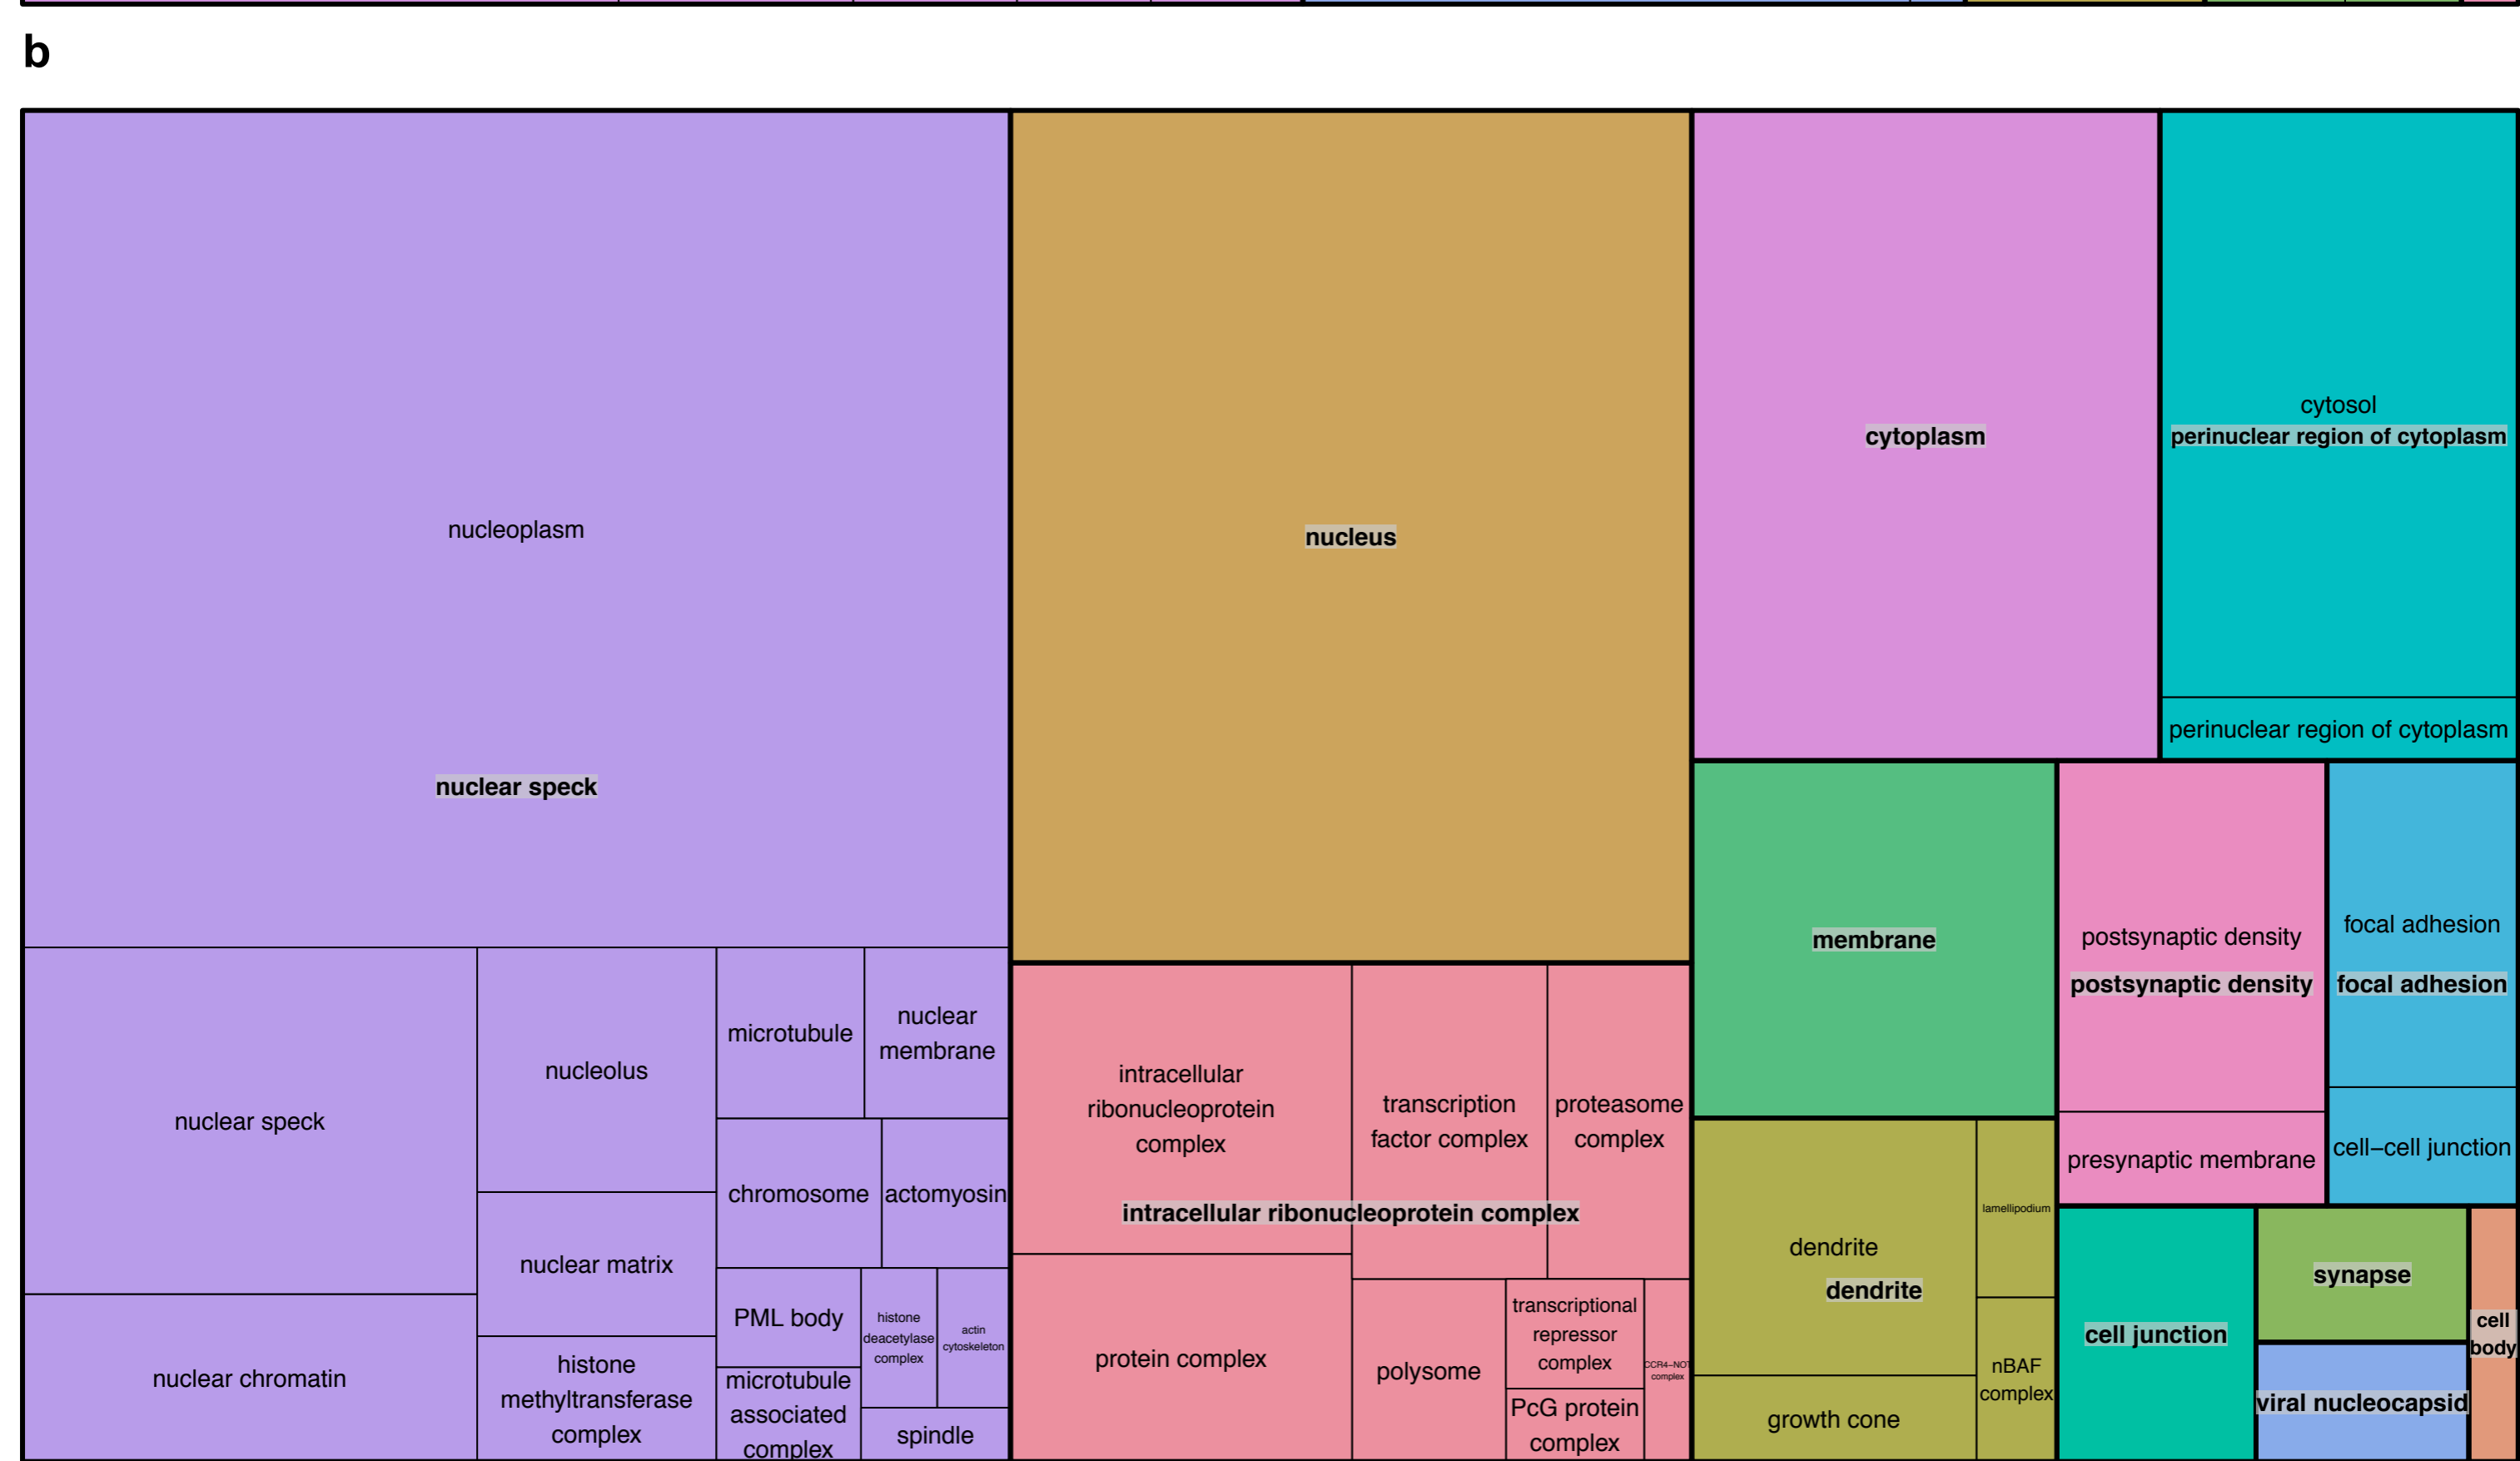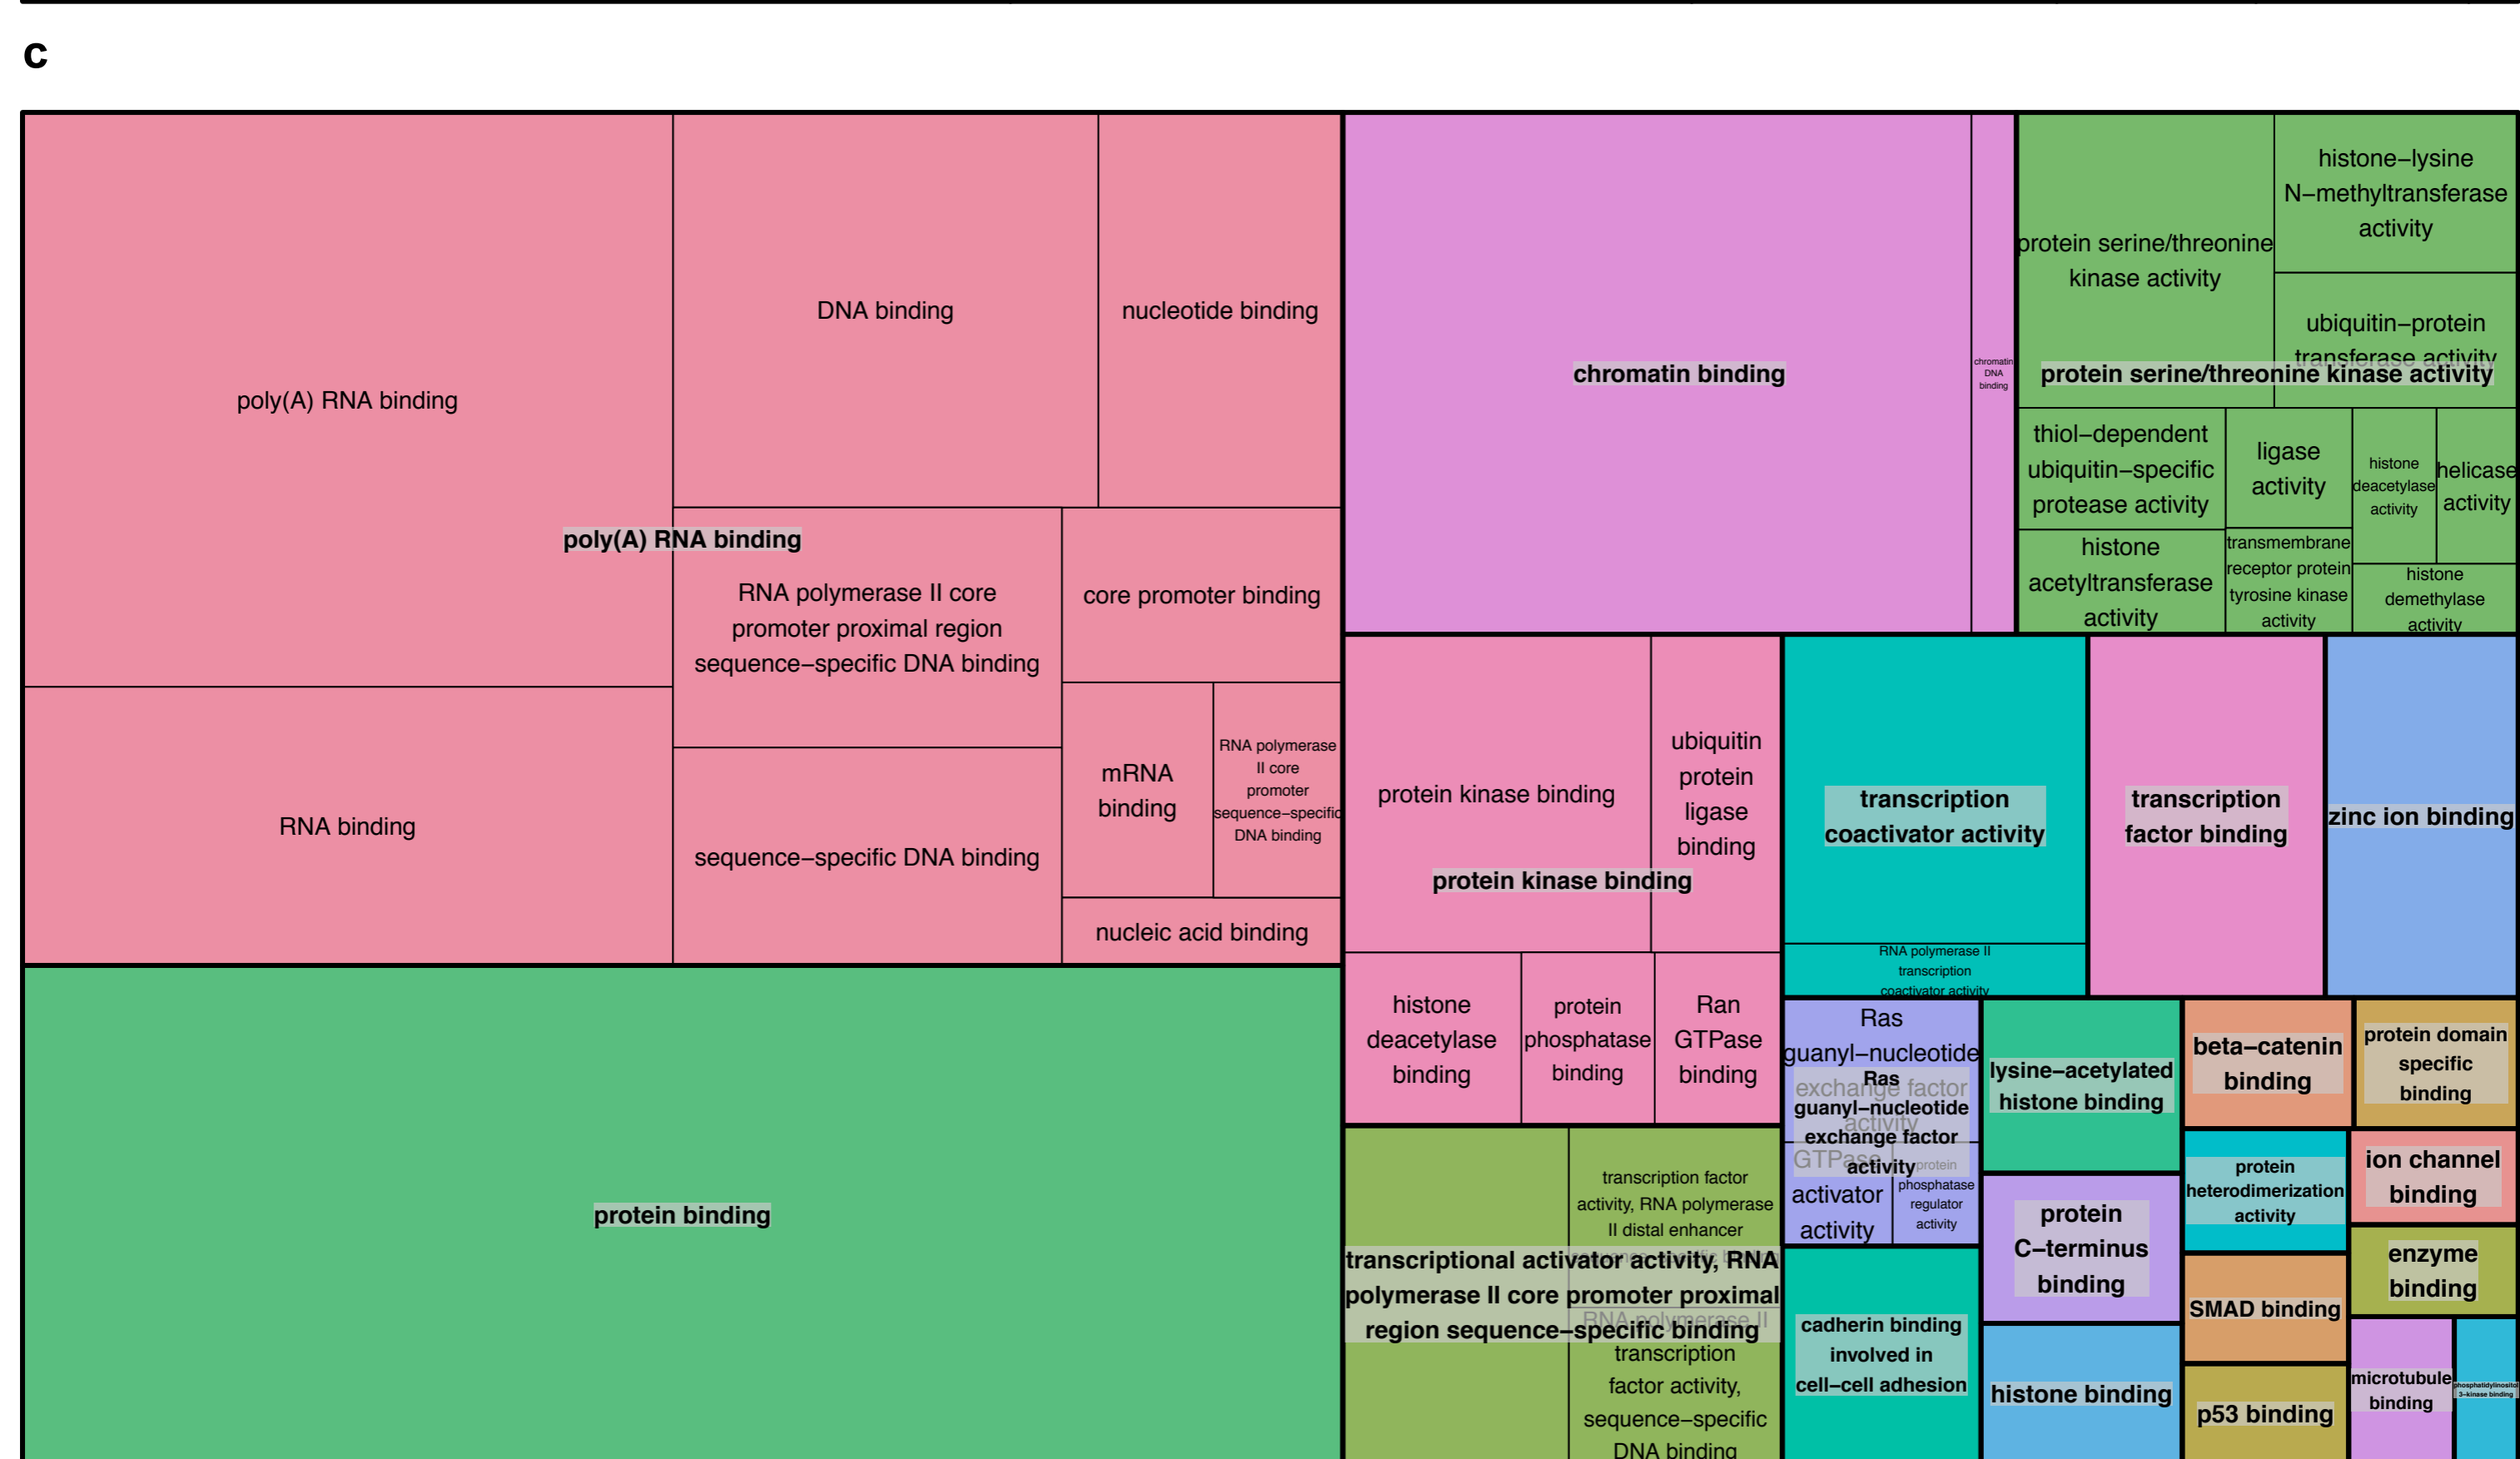

Supplement: NIHMS1668378-supplement-supp_figure_10.pdf [file NIHMS1668378-supplement-supp_figure_10.pdf]

a

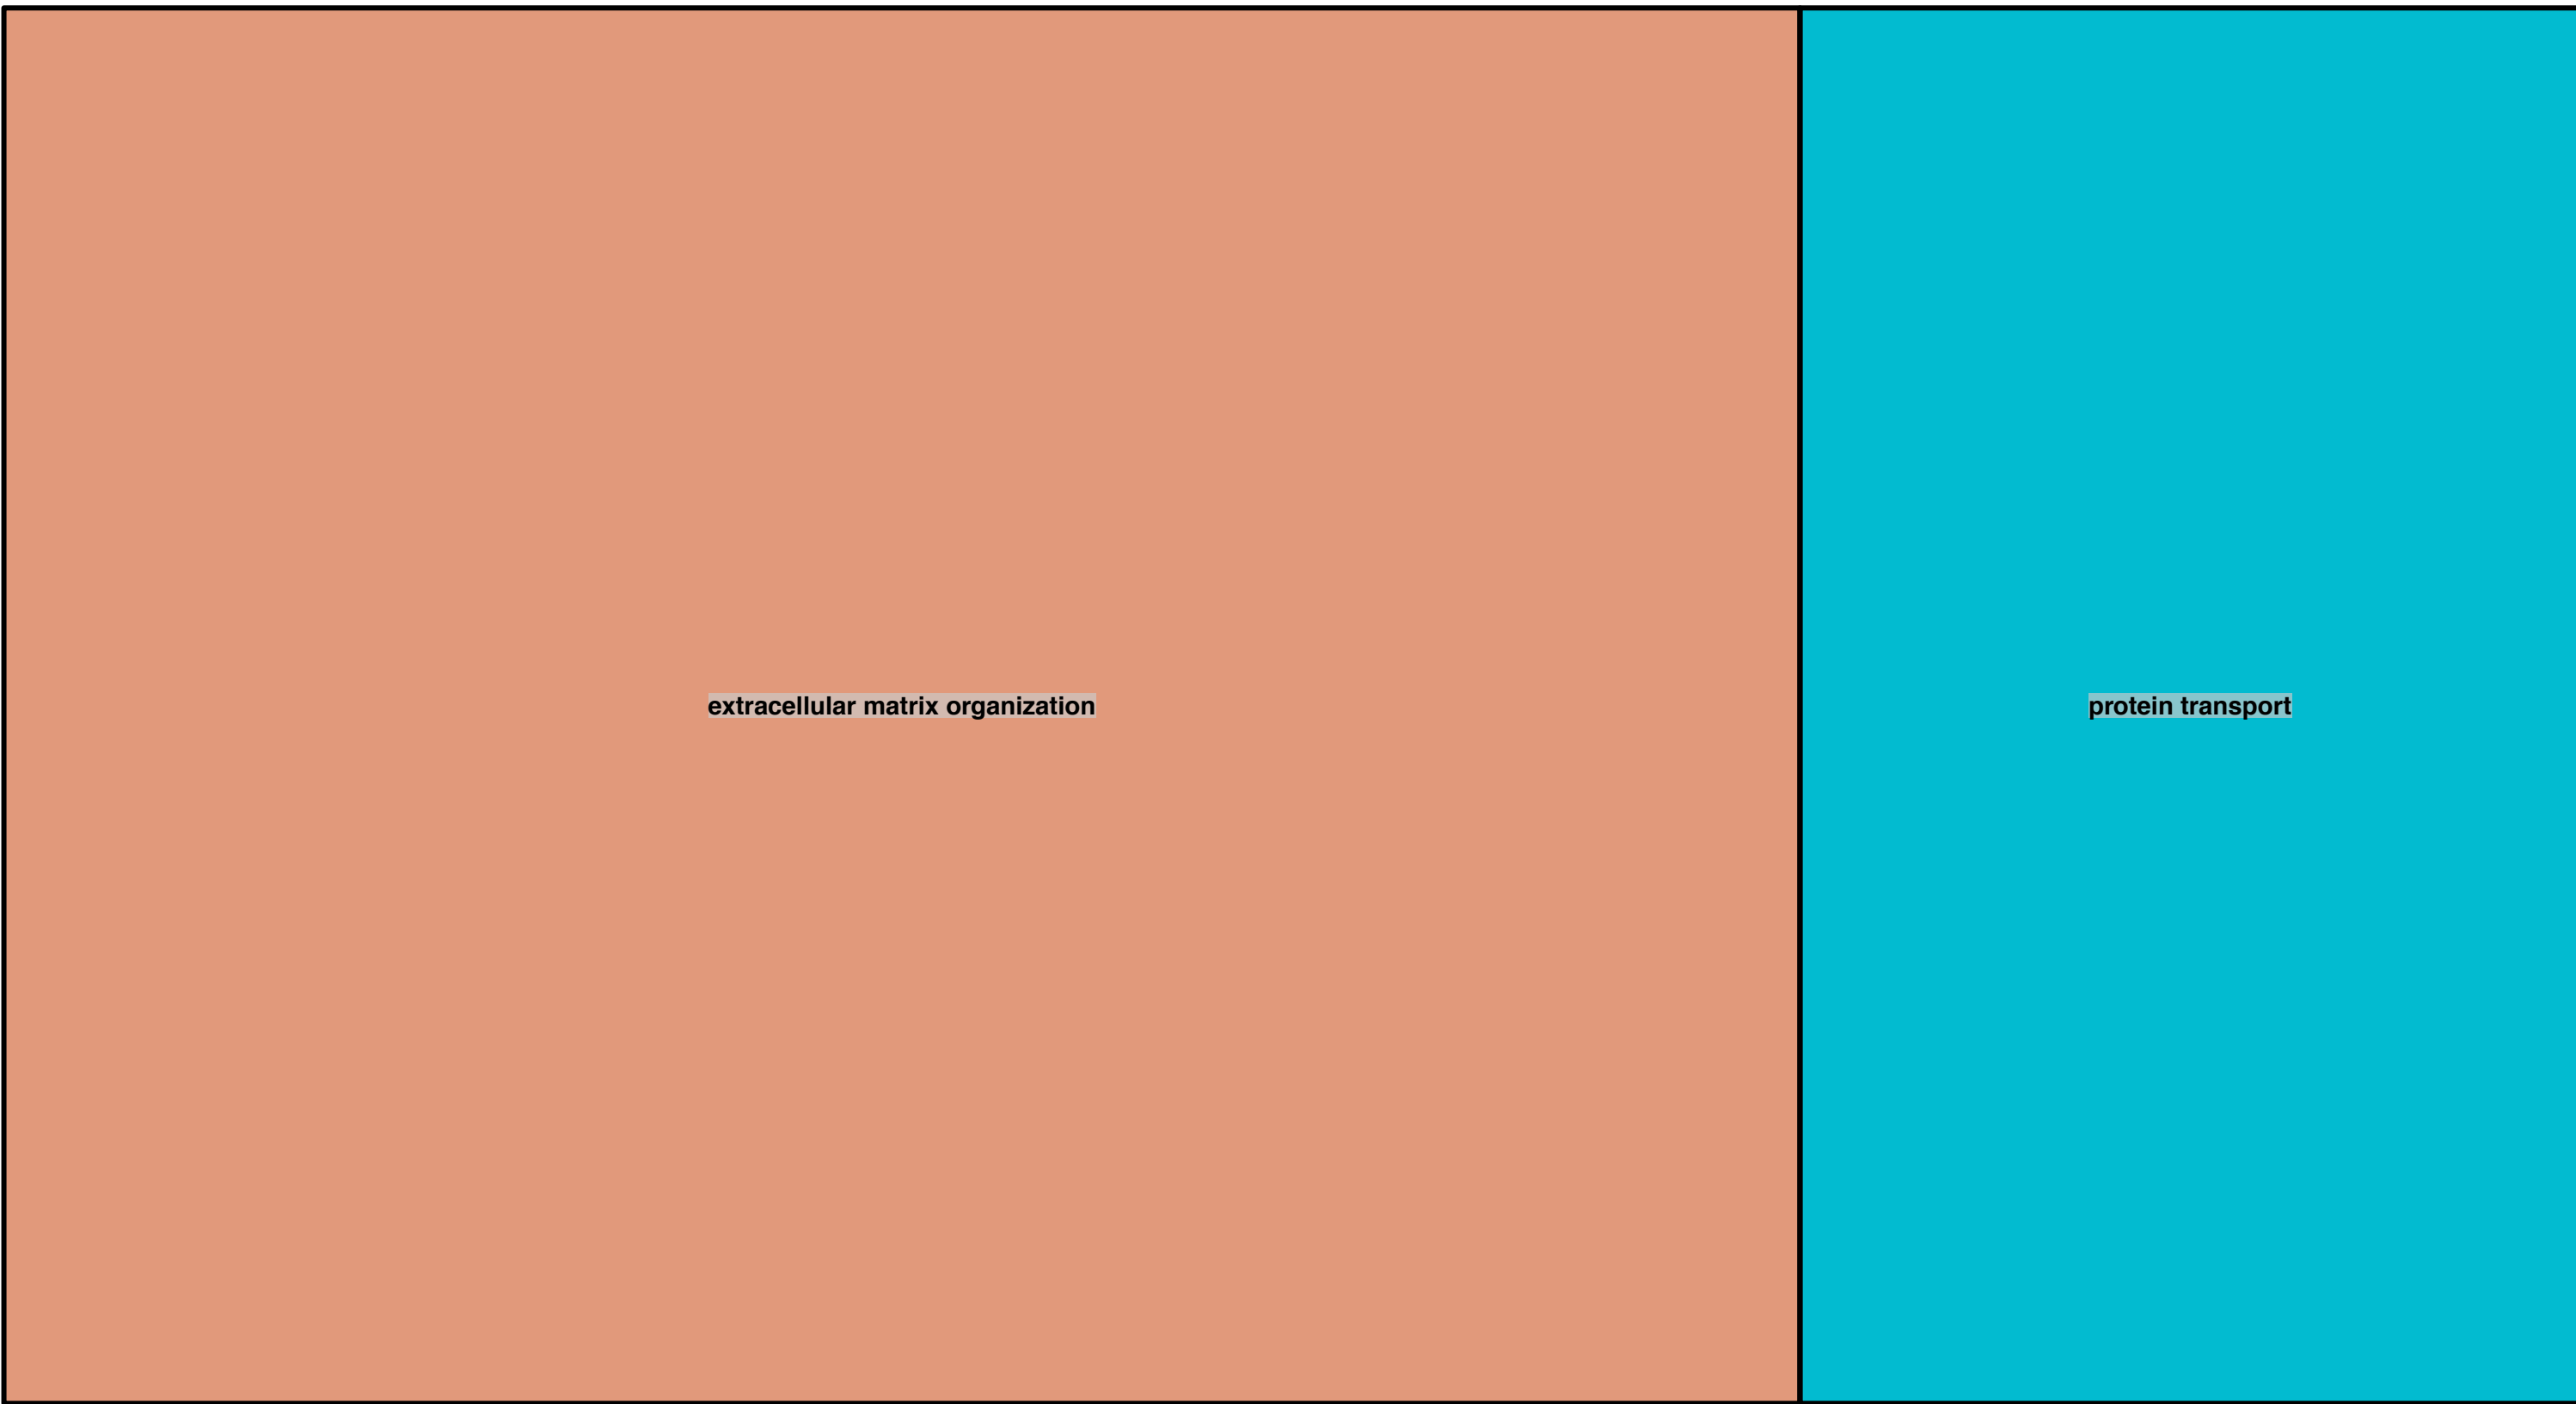

b

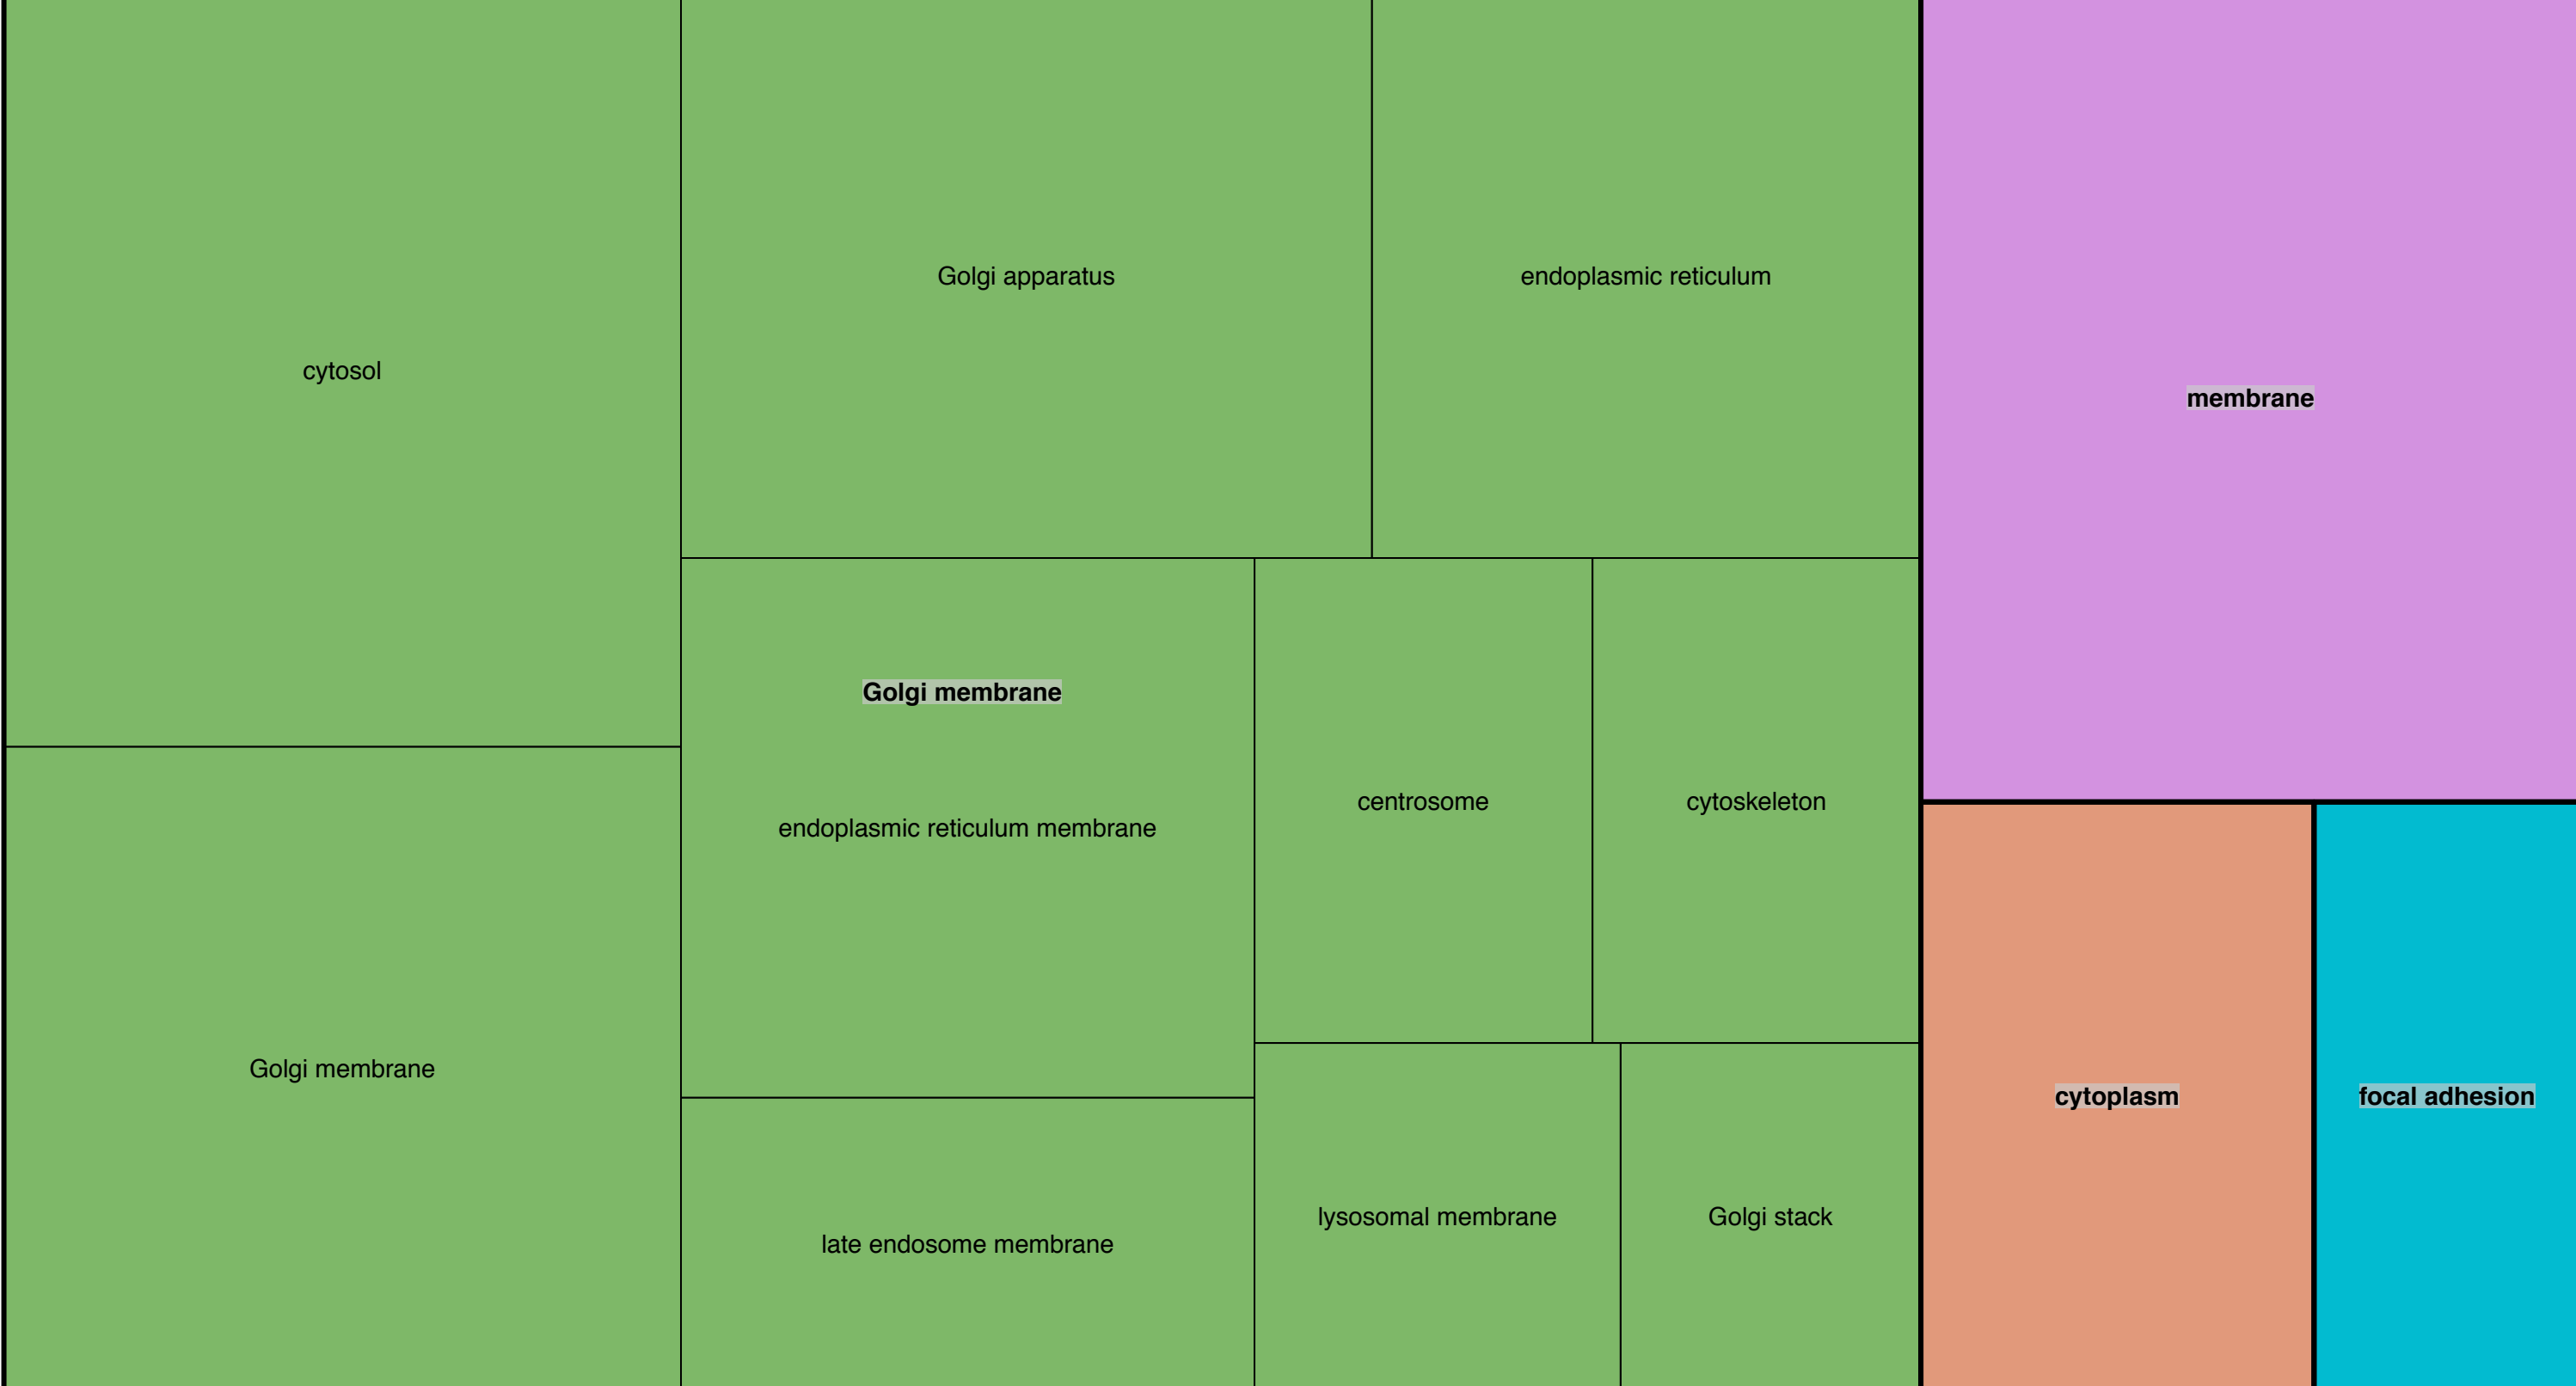

c

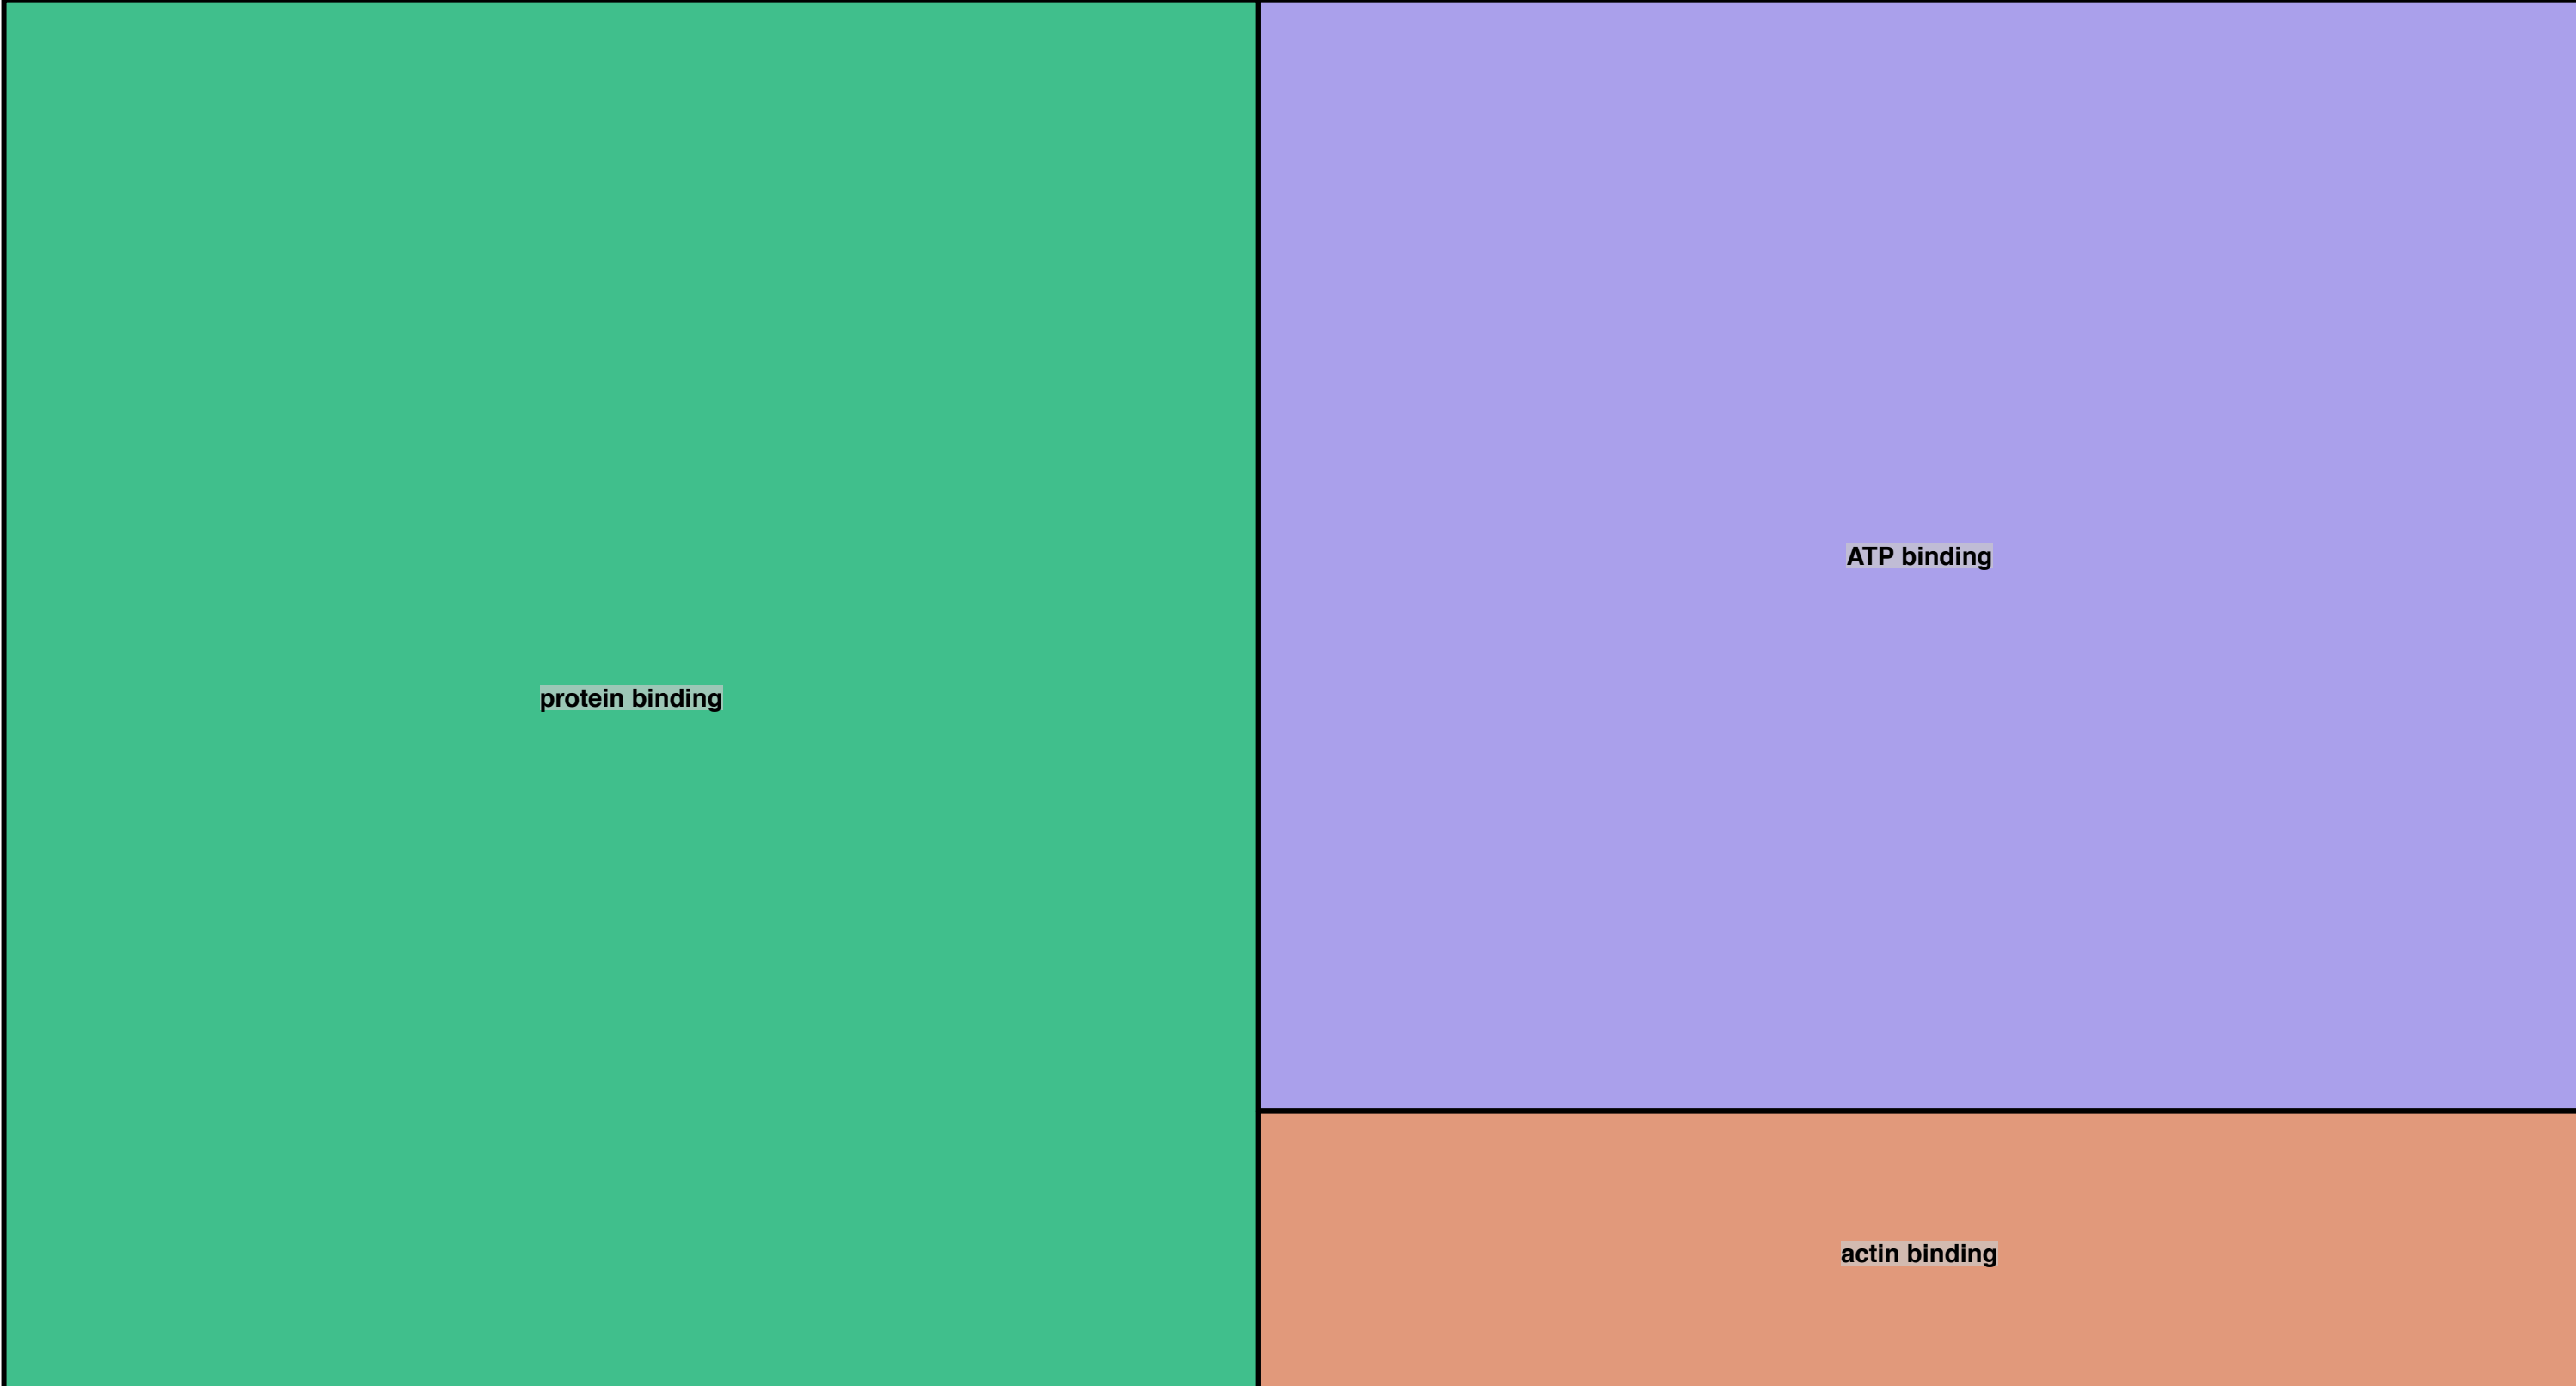

Supplement: NIHMS1668378-supplement-supp_figure_11.pdf [file NIHMS1668378-supplement-supp_figure_11.pdf]

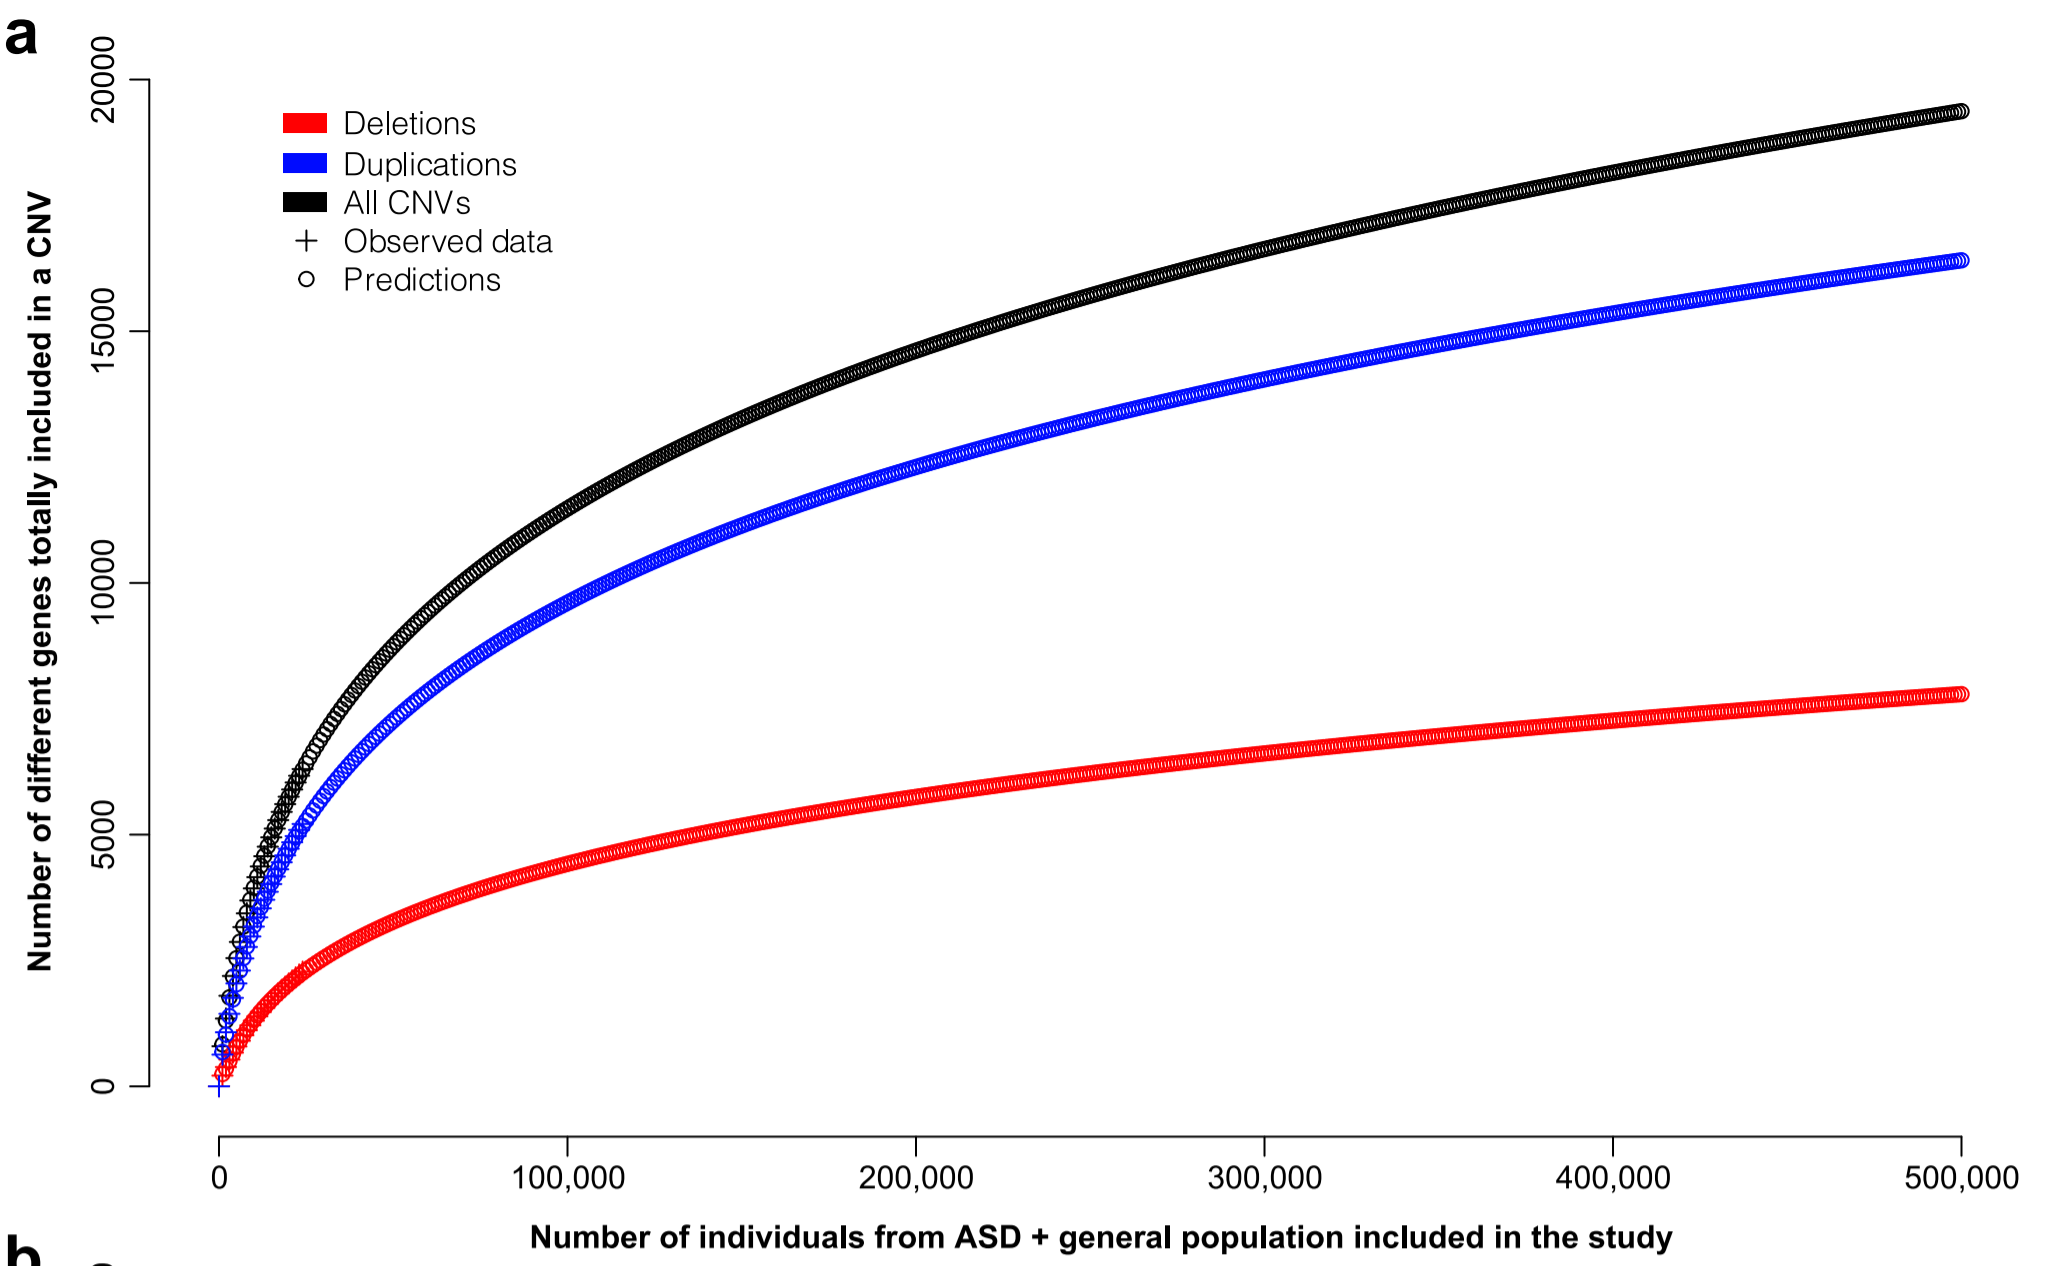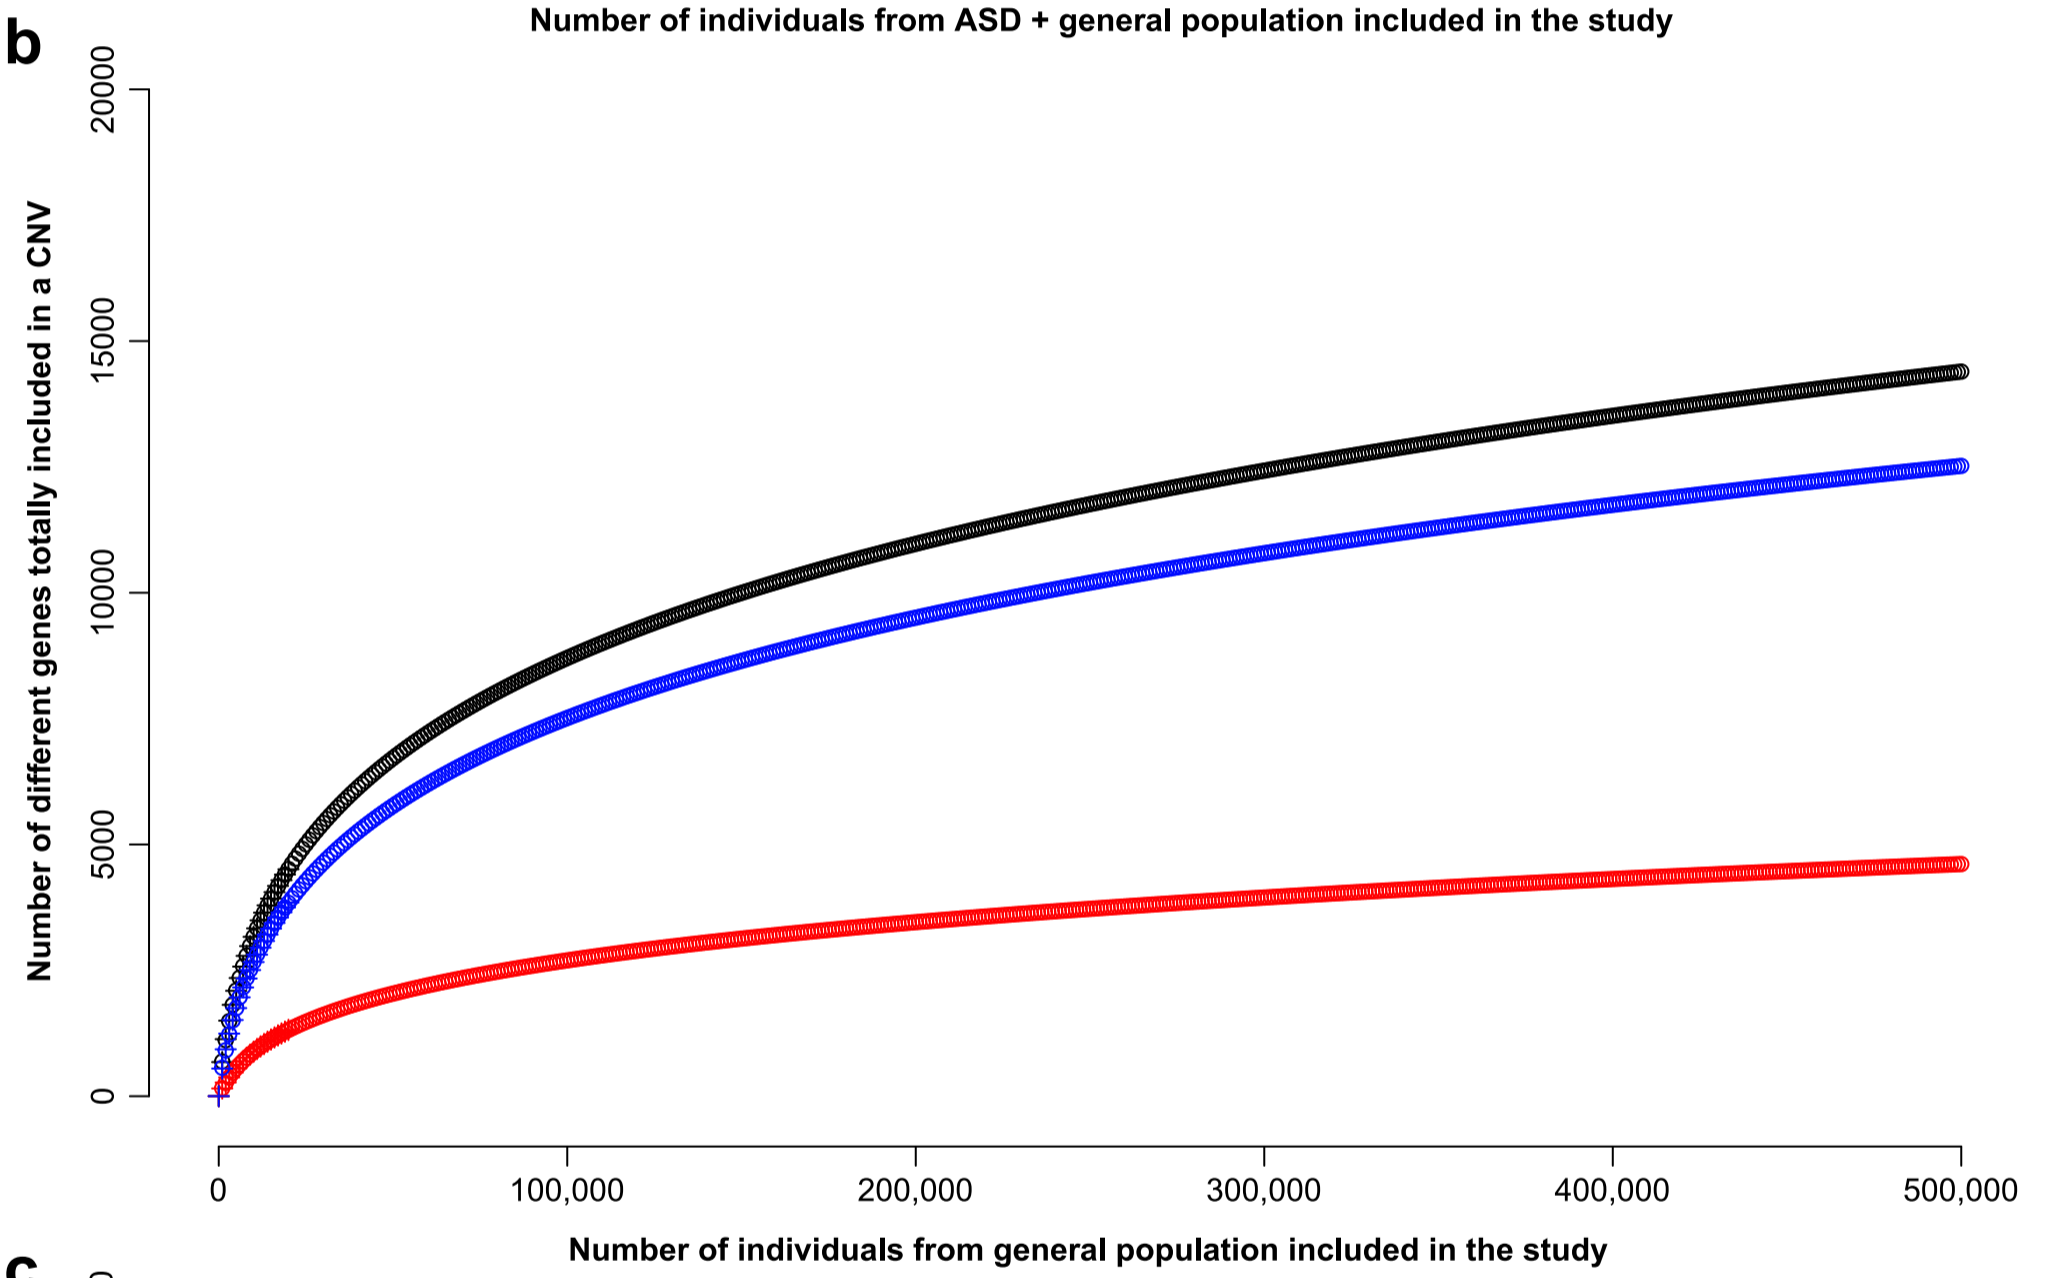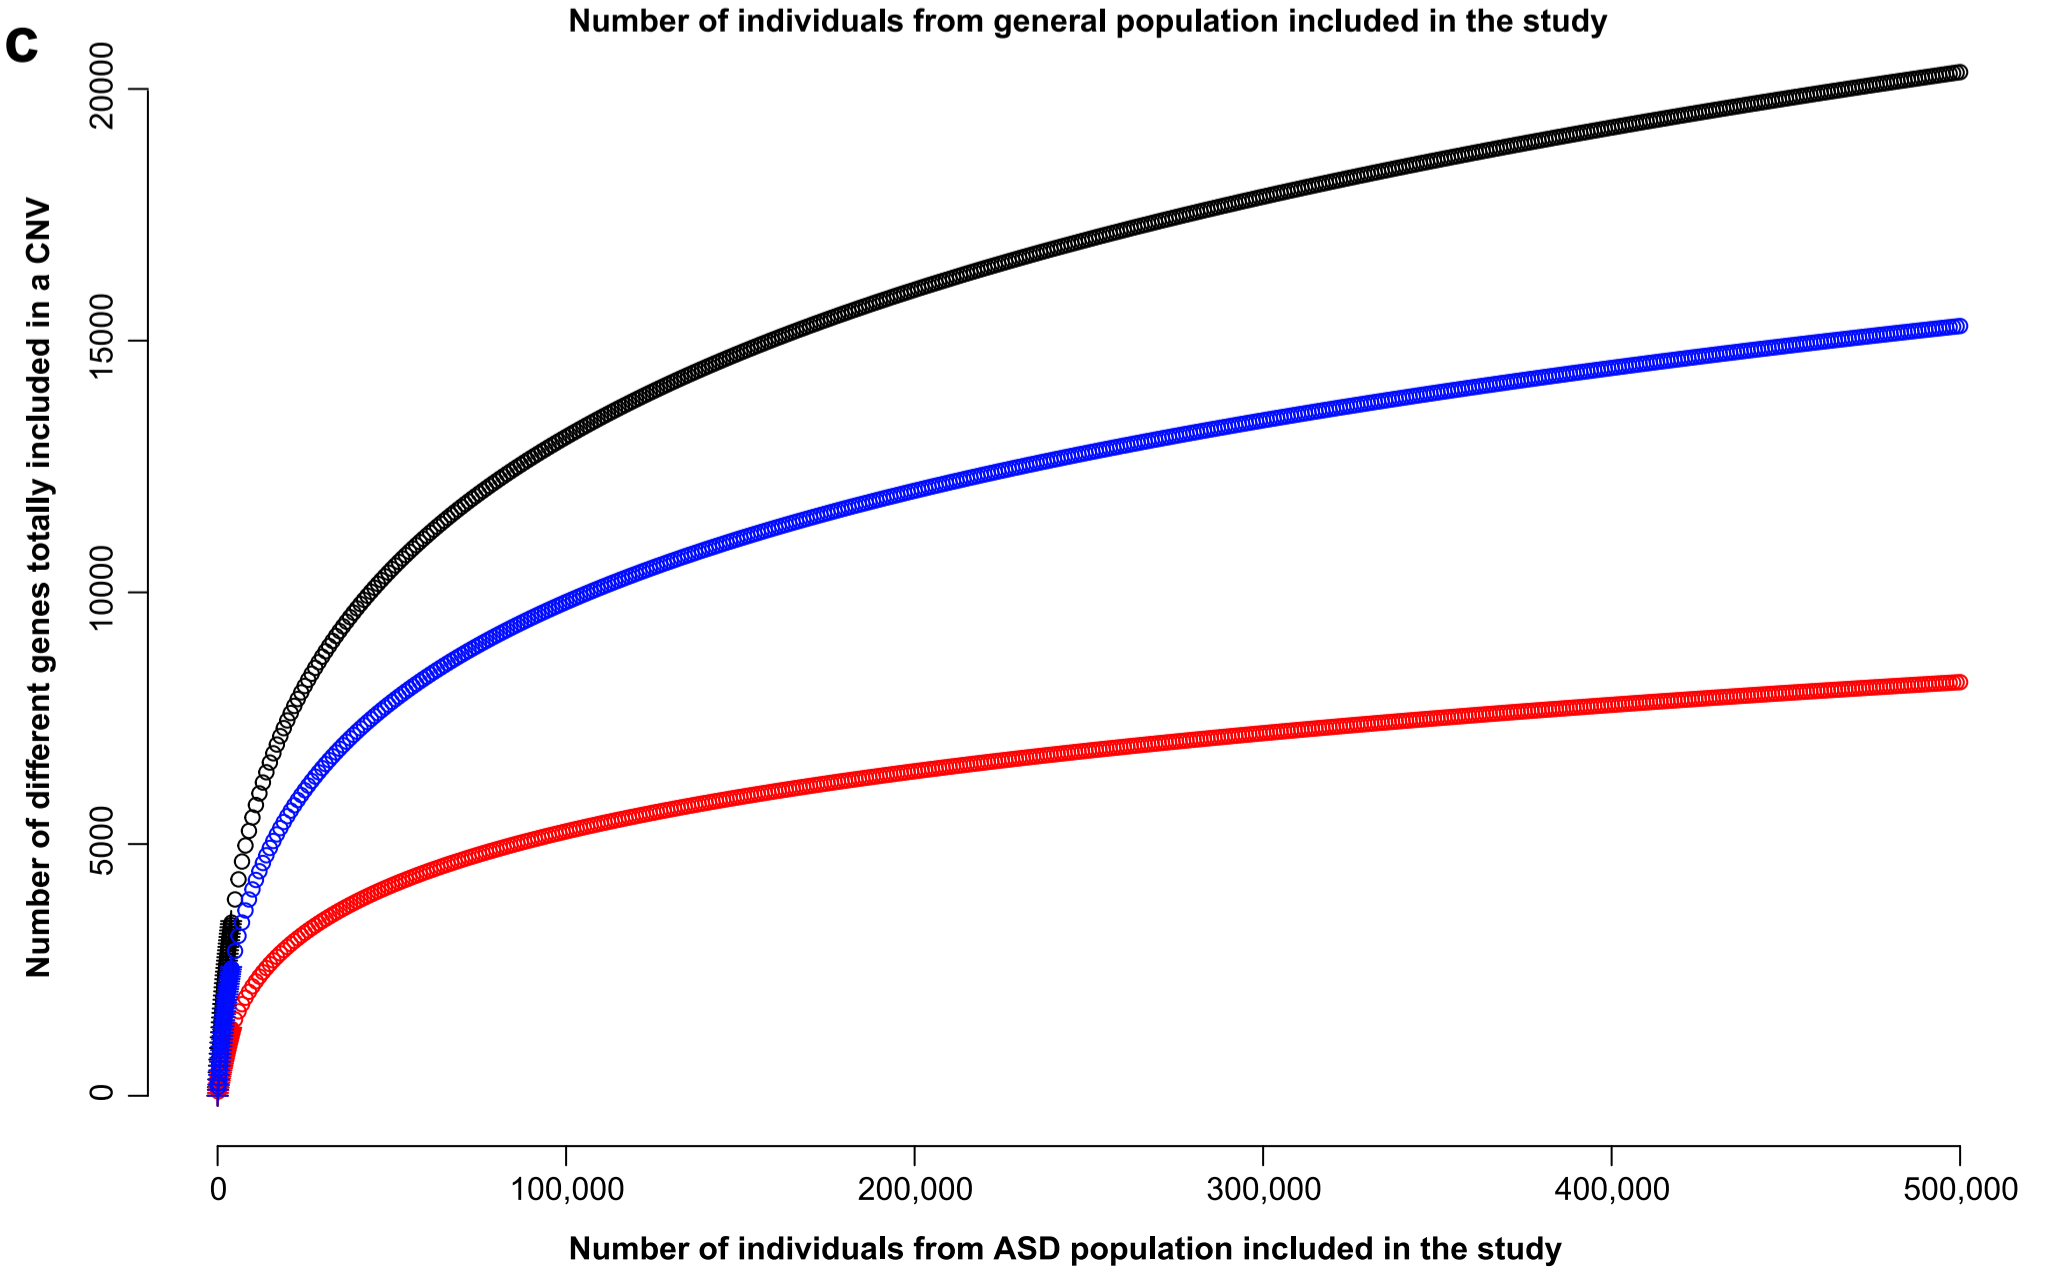

Supplement: NIHMS1668378-supplement-supp_figure_12.pdf [file NIHMS1668378-supplement-supp_figure_12.pdf]

**a**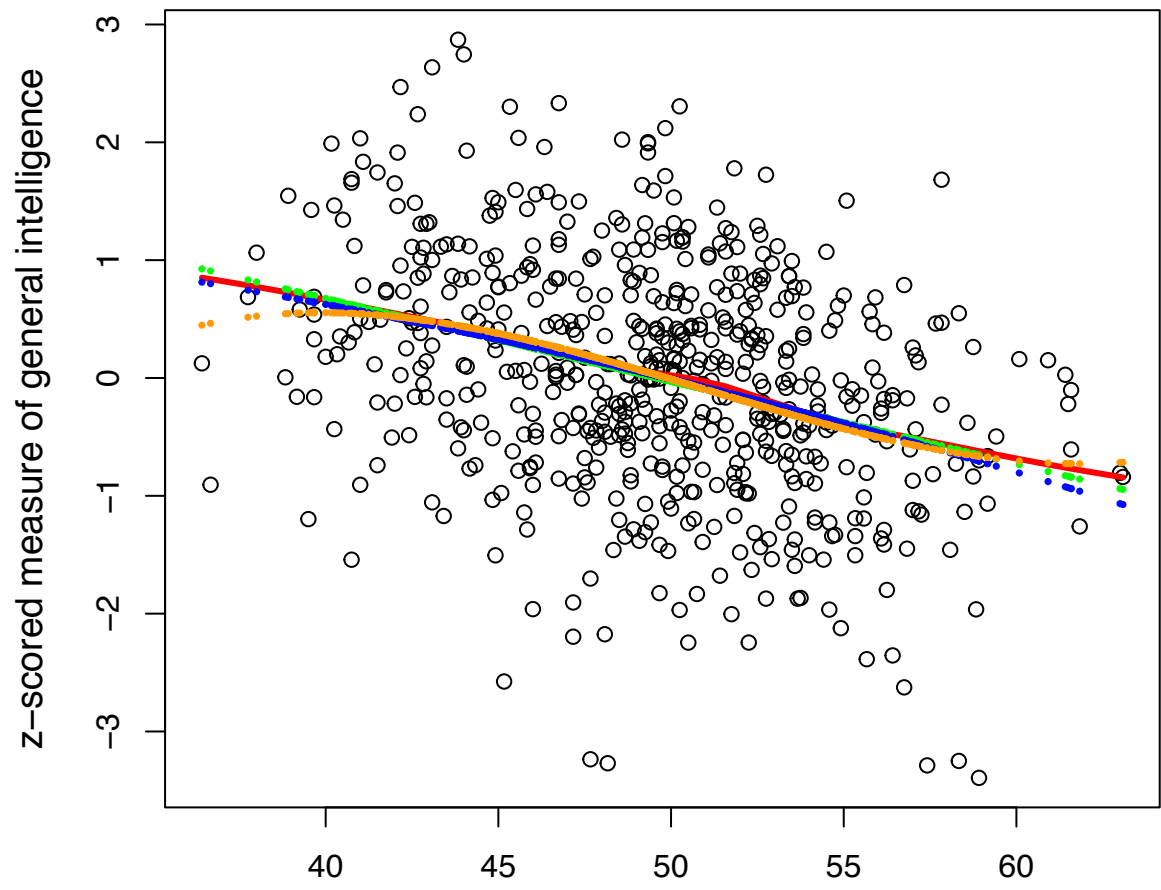**b**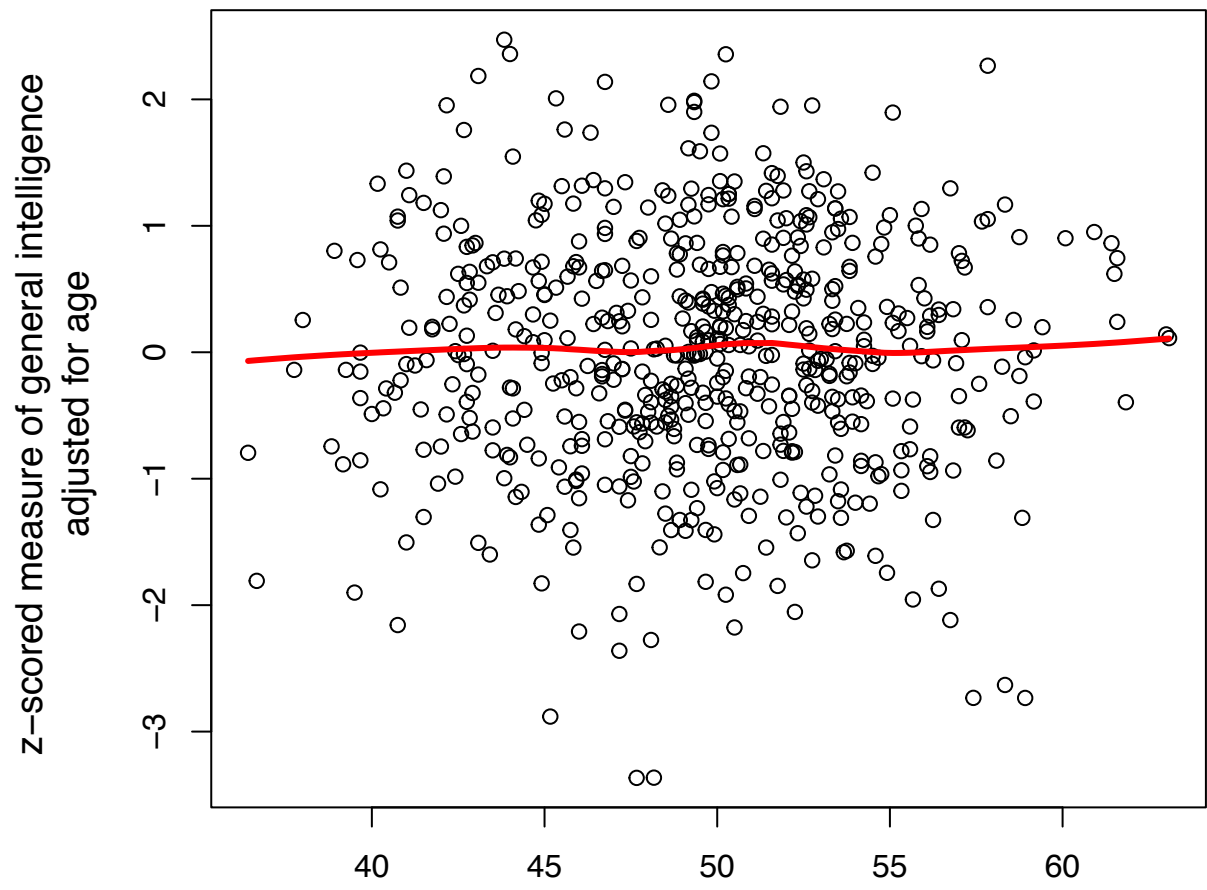**c**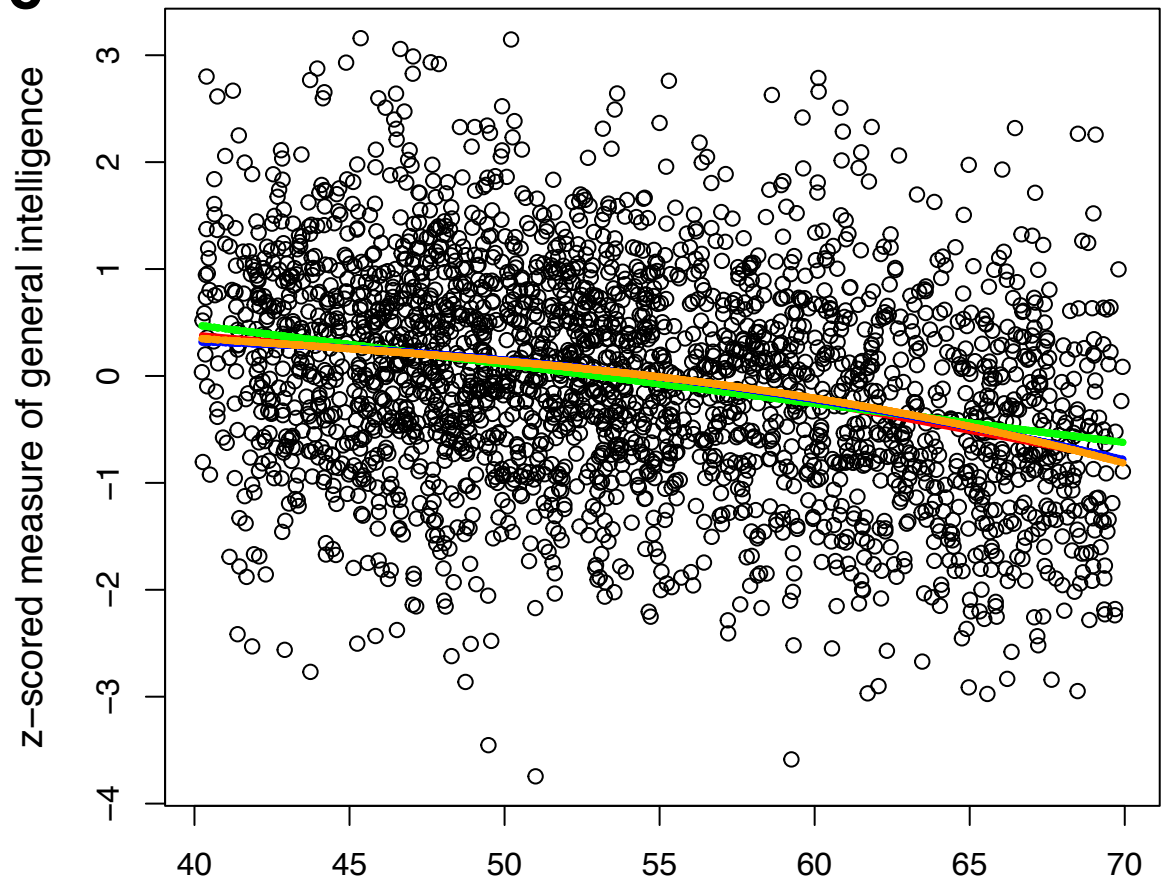**d**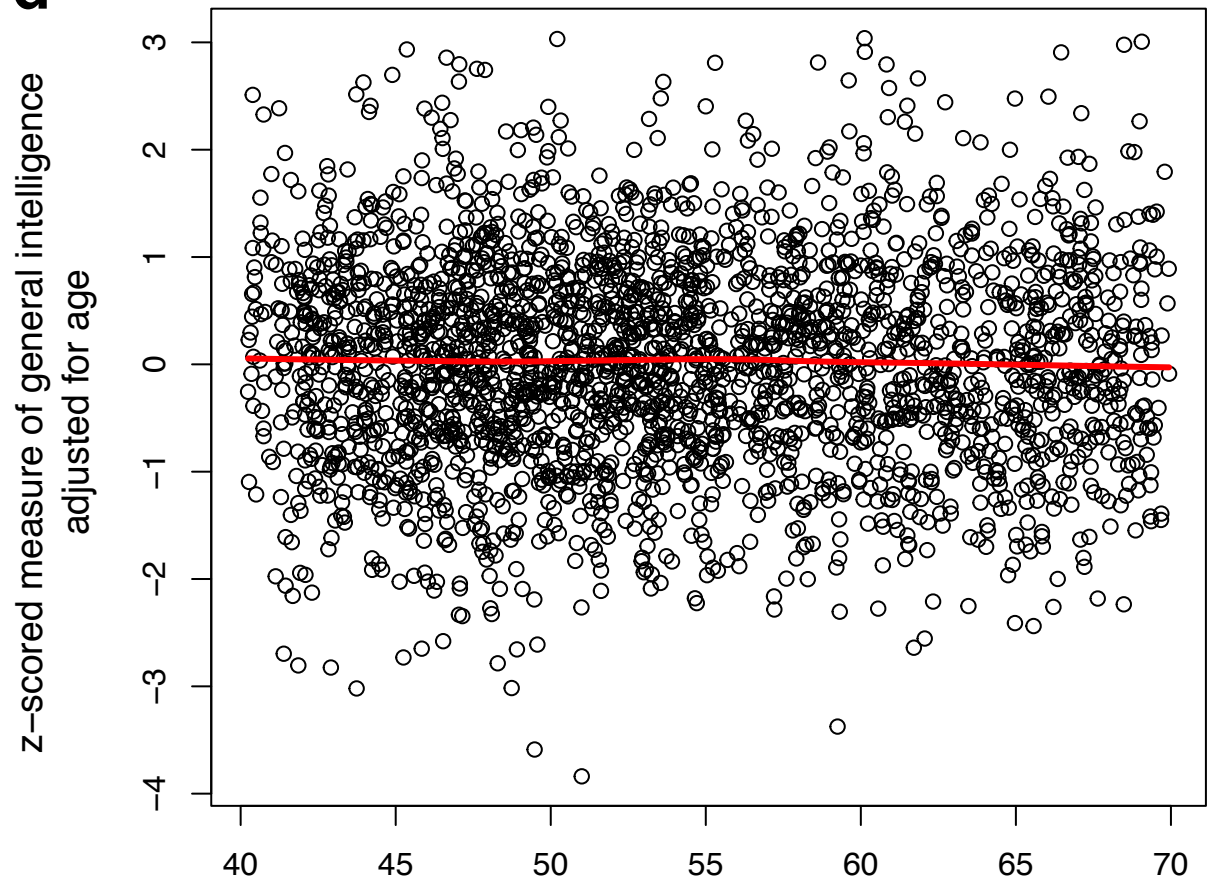**e**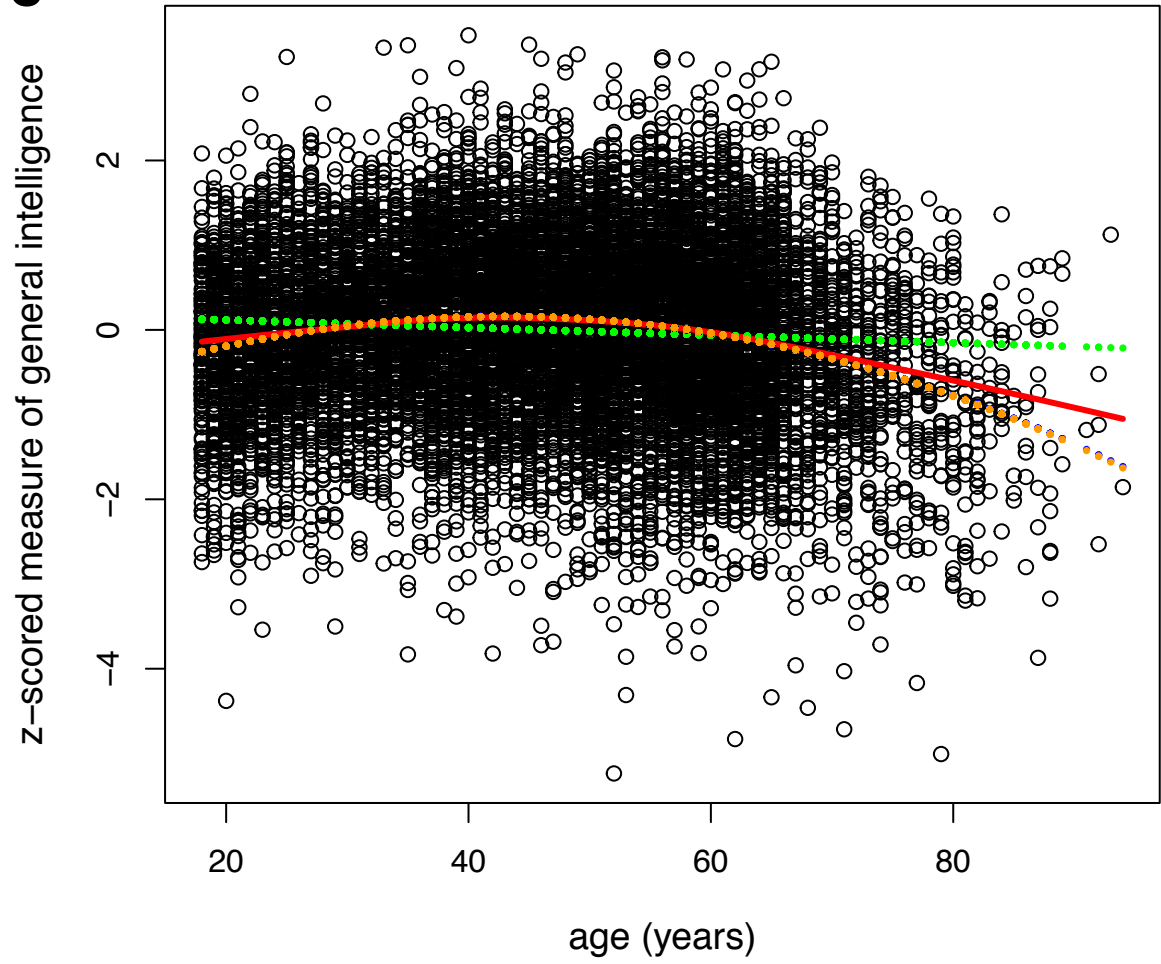**f**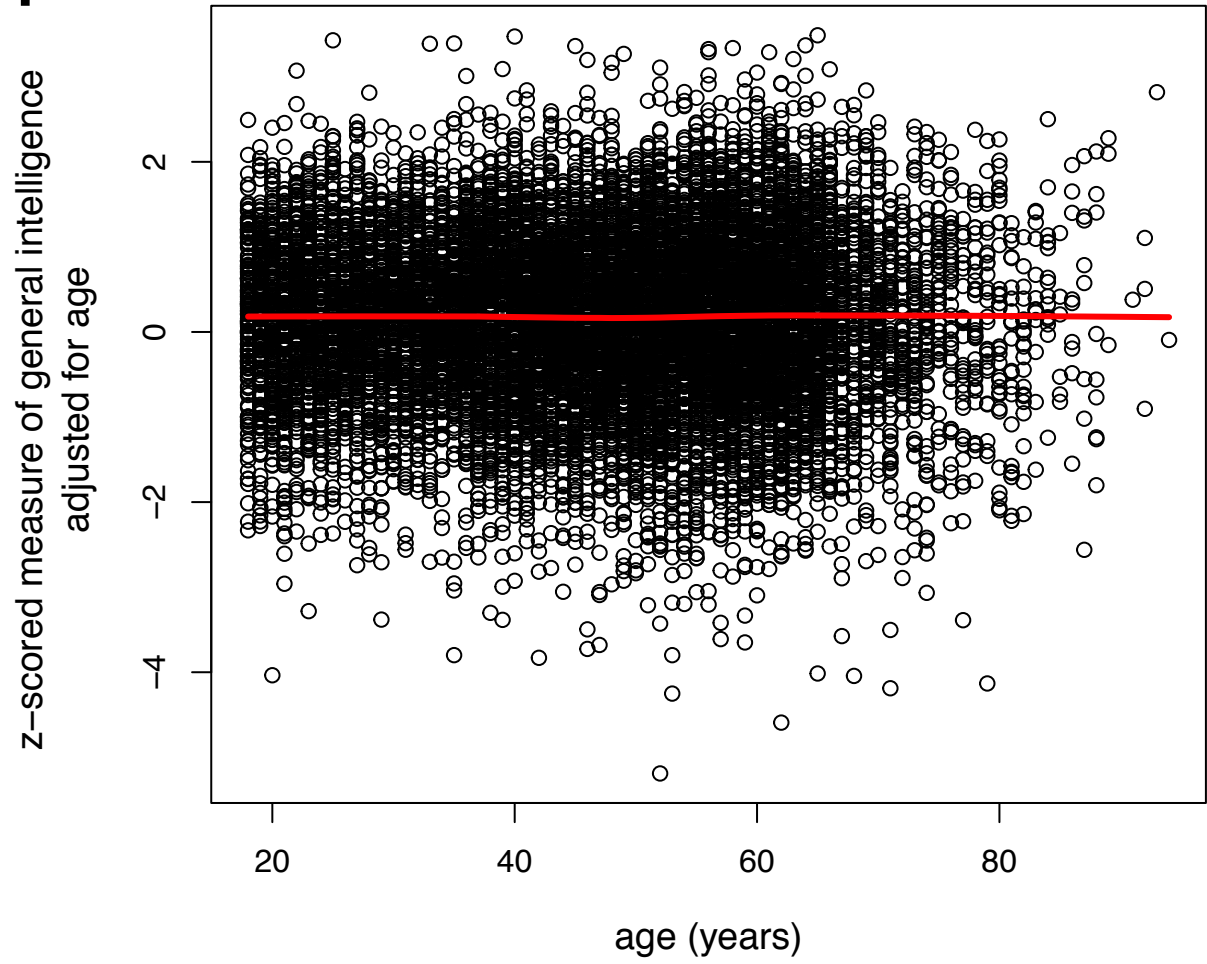

Supplement: NIHMS1668378-supplement-supp_figure_2.pdf [file NIHMS1668378-supplement-supp_figure_2.pdf]

a

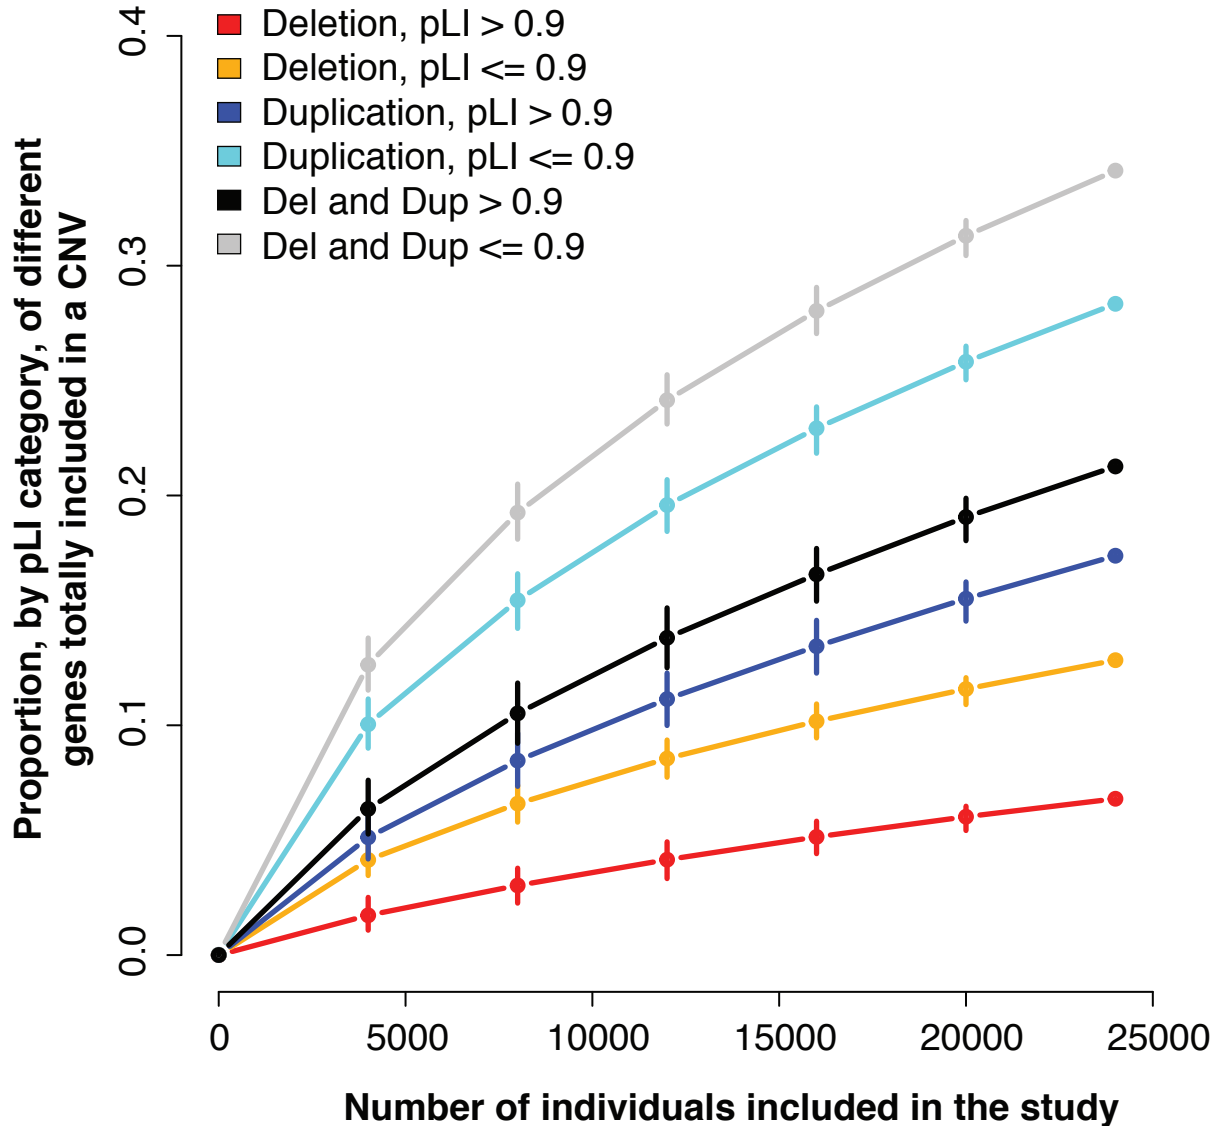

b

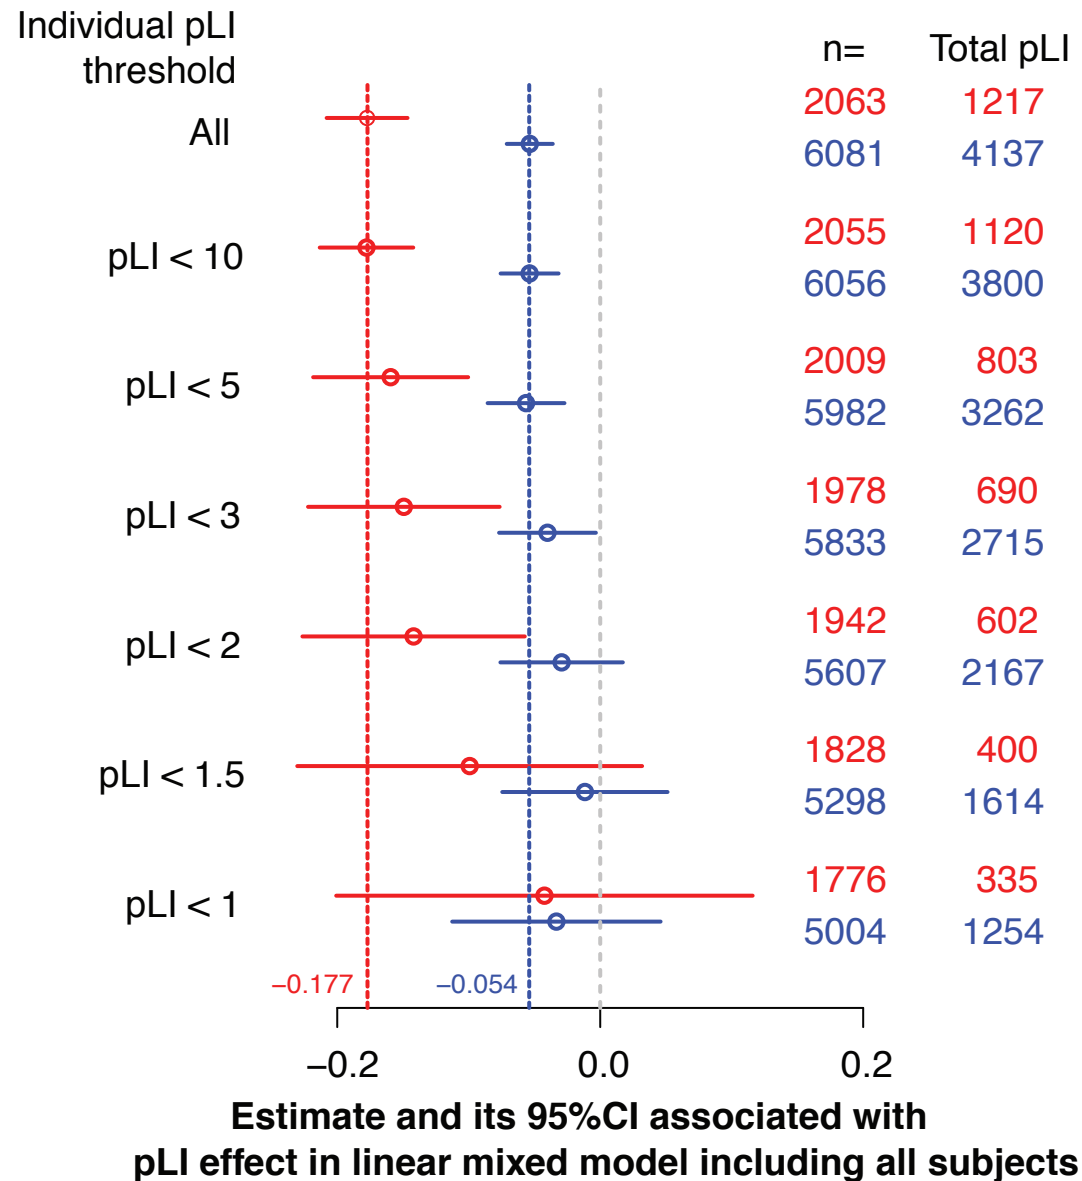

Supplement: NIHMS1668378-supplement-supp_figure_4.pdf [file NIHMS1668378-supplement-supp_figure_4.pdf]

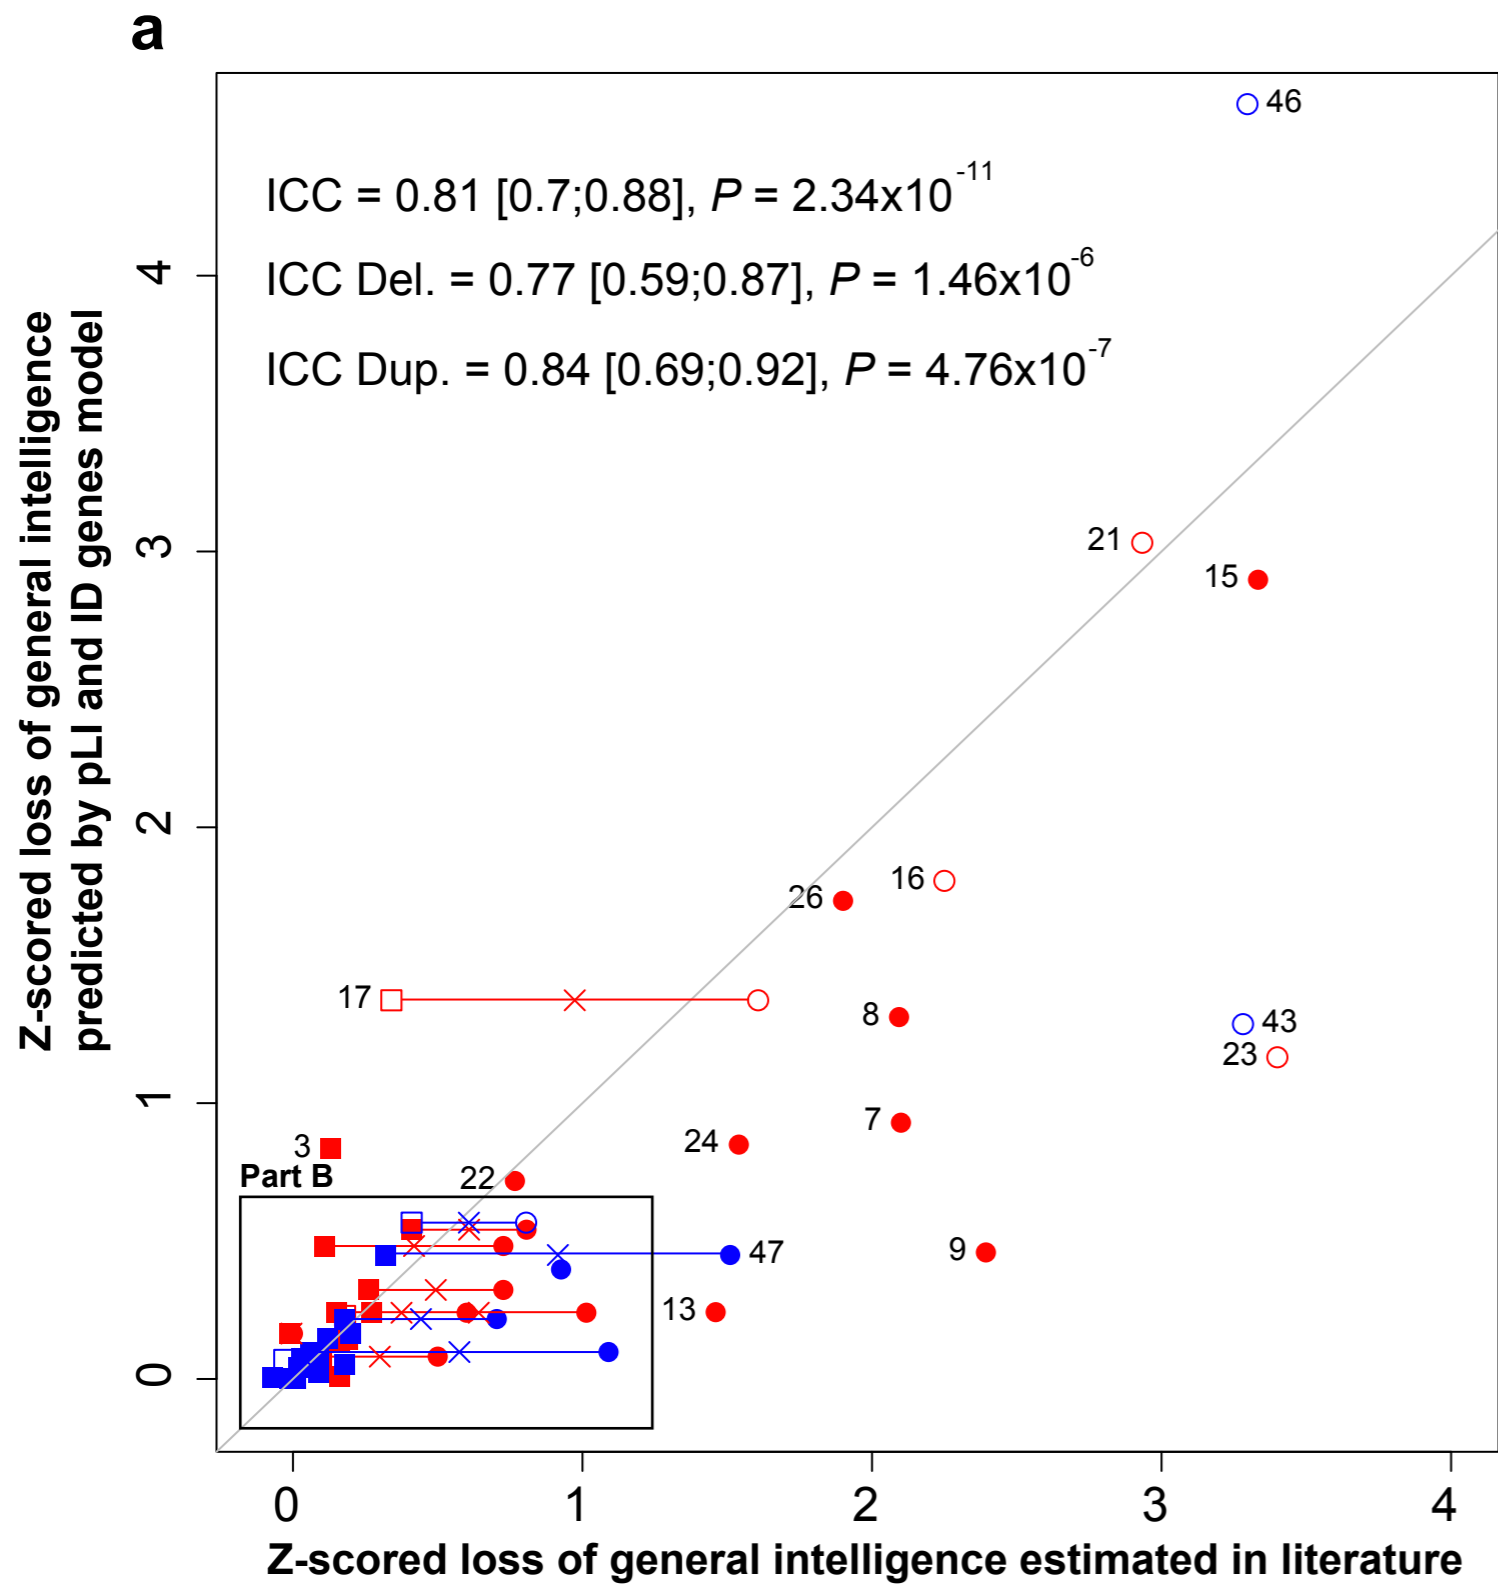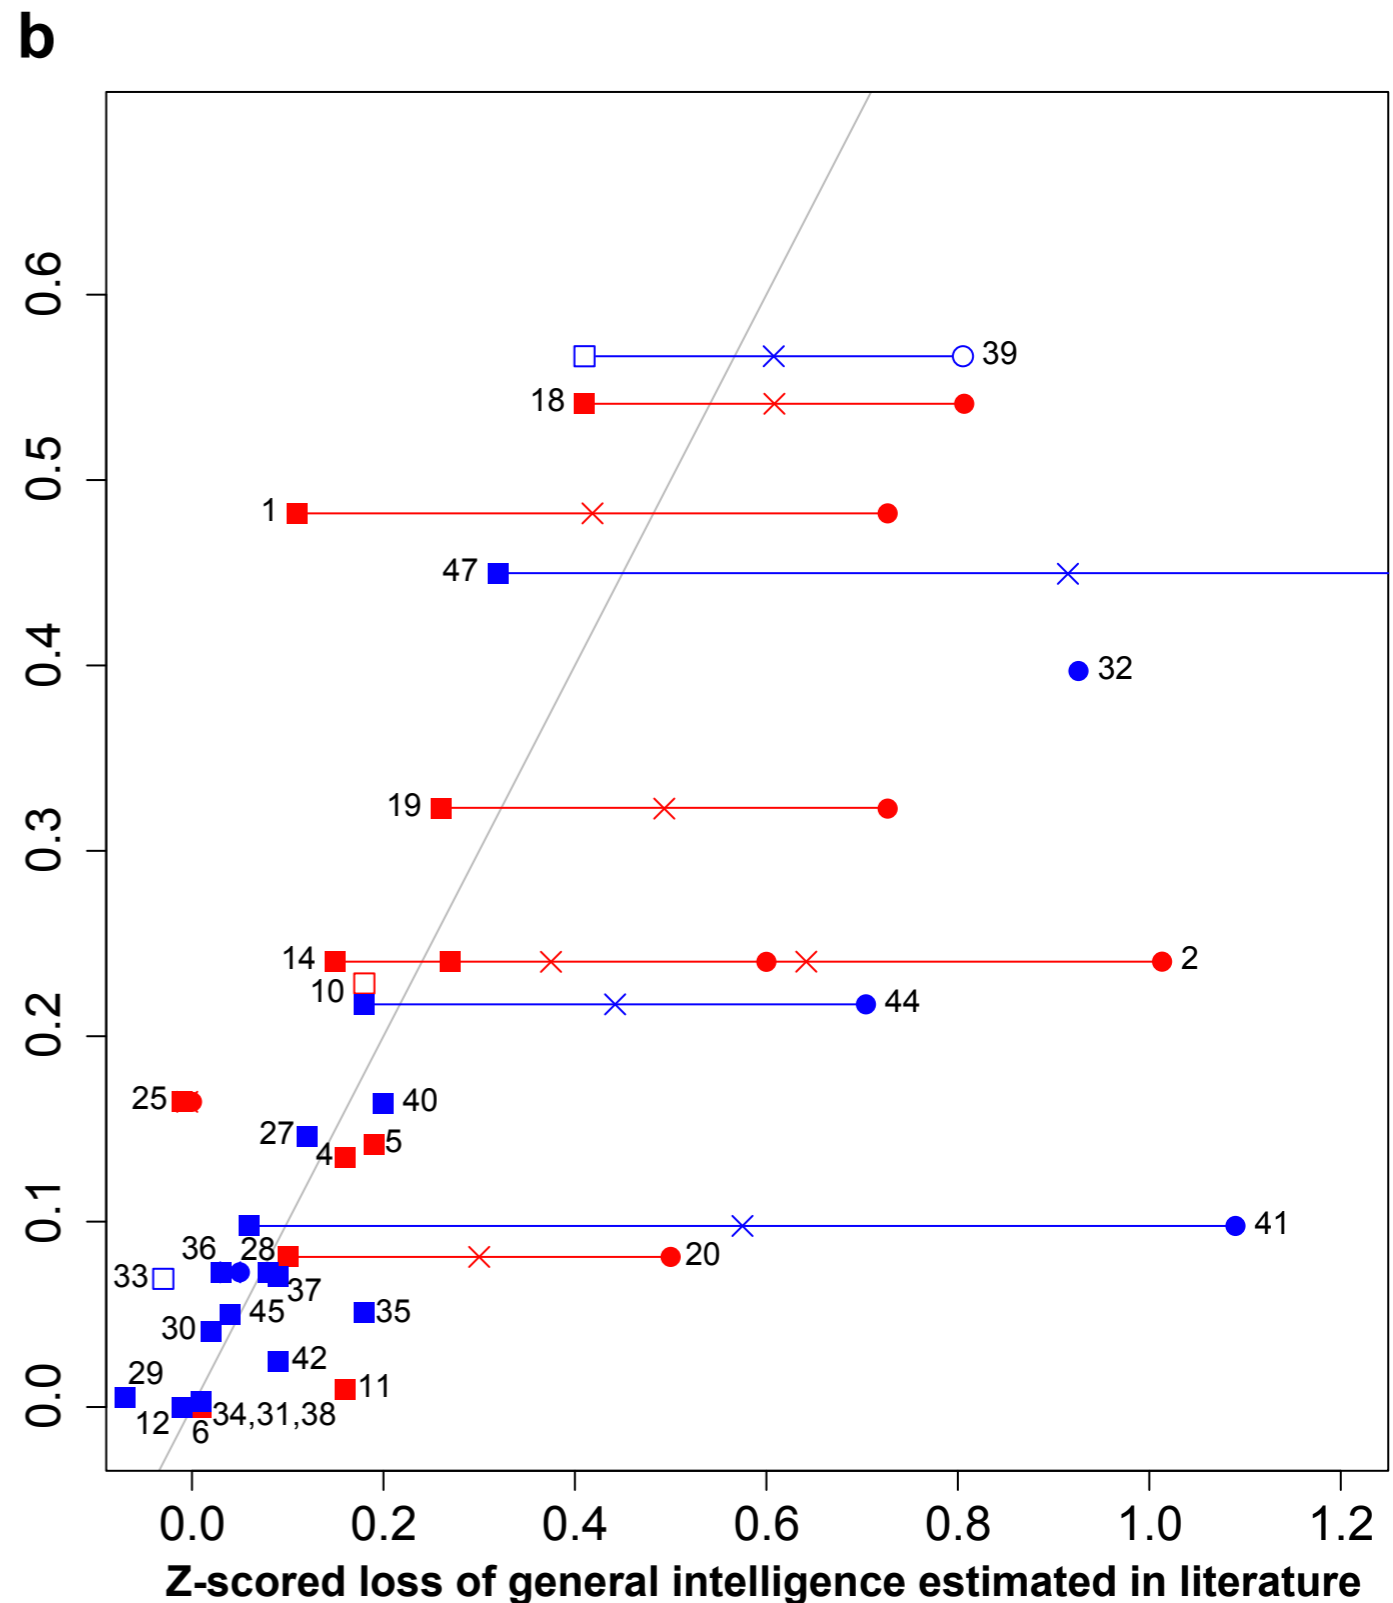

Supplement: NIHMS1668378-supplement-supp_figure_7.pdf [file NIHMS1668378-supplement-supp_figure_7.pdf]

**a**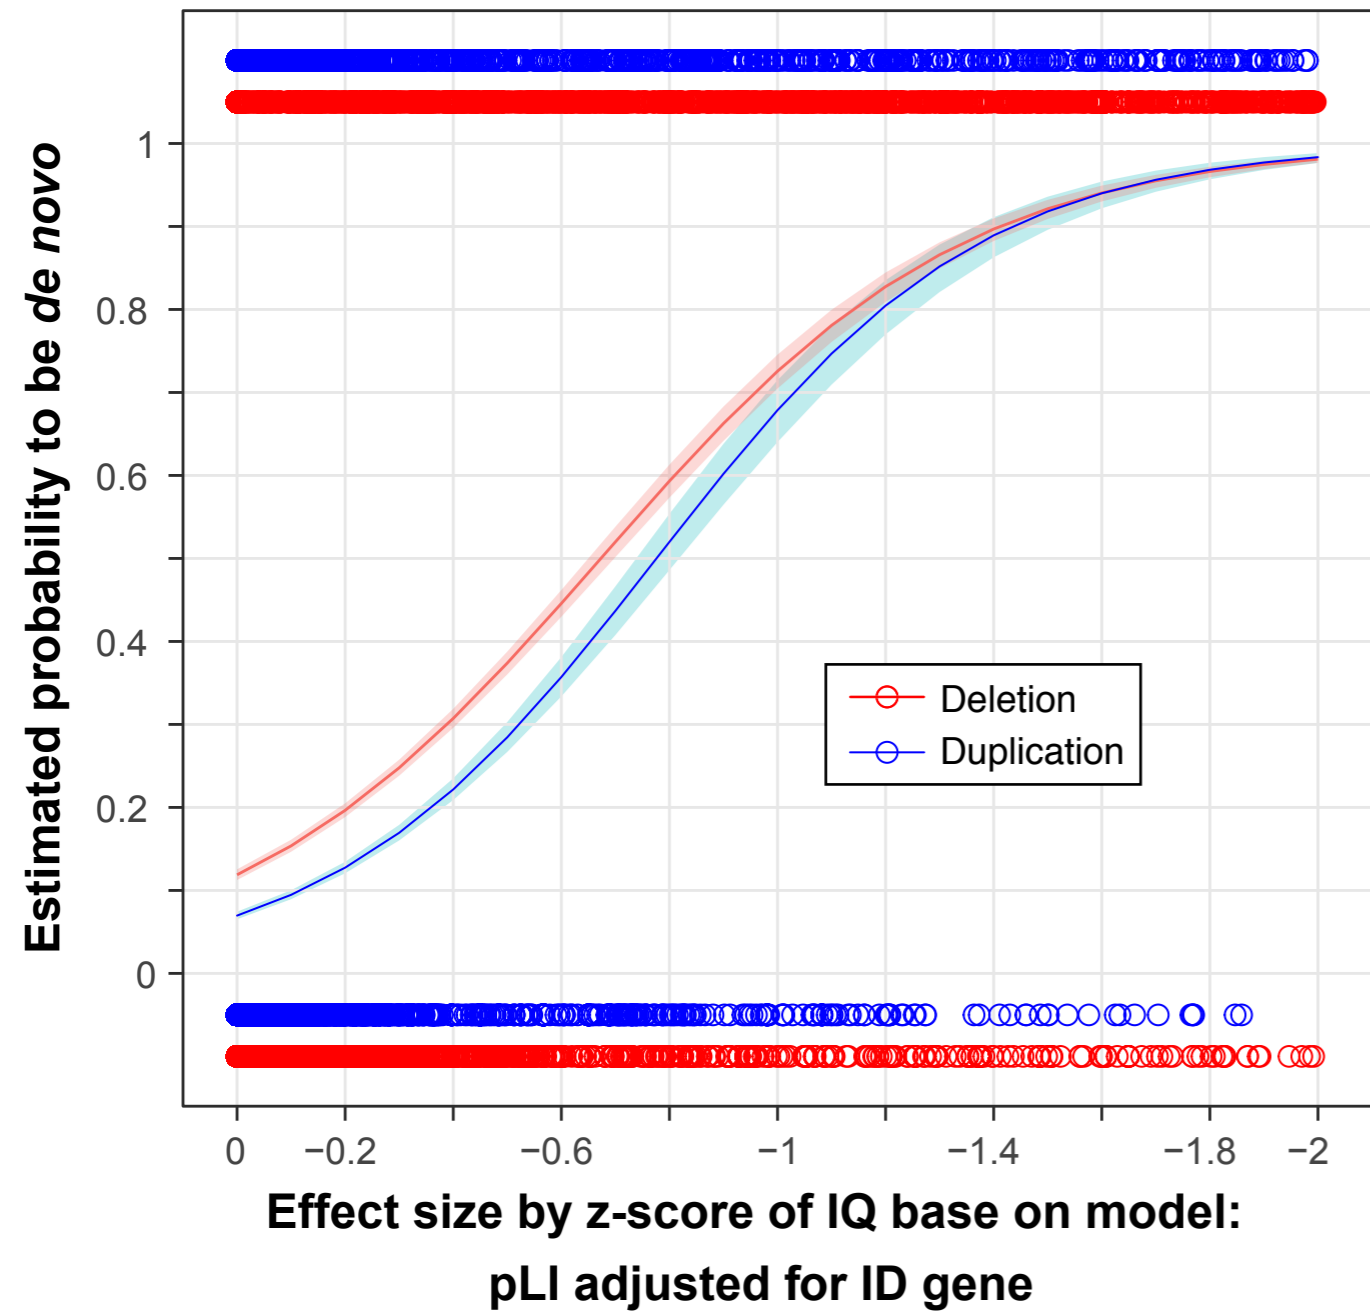**b**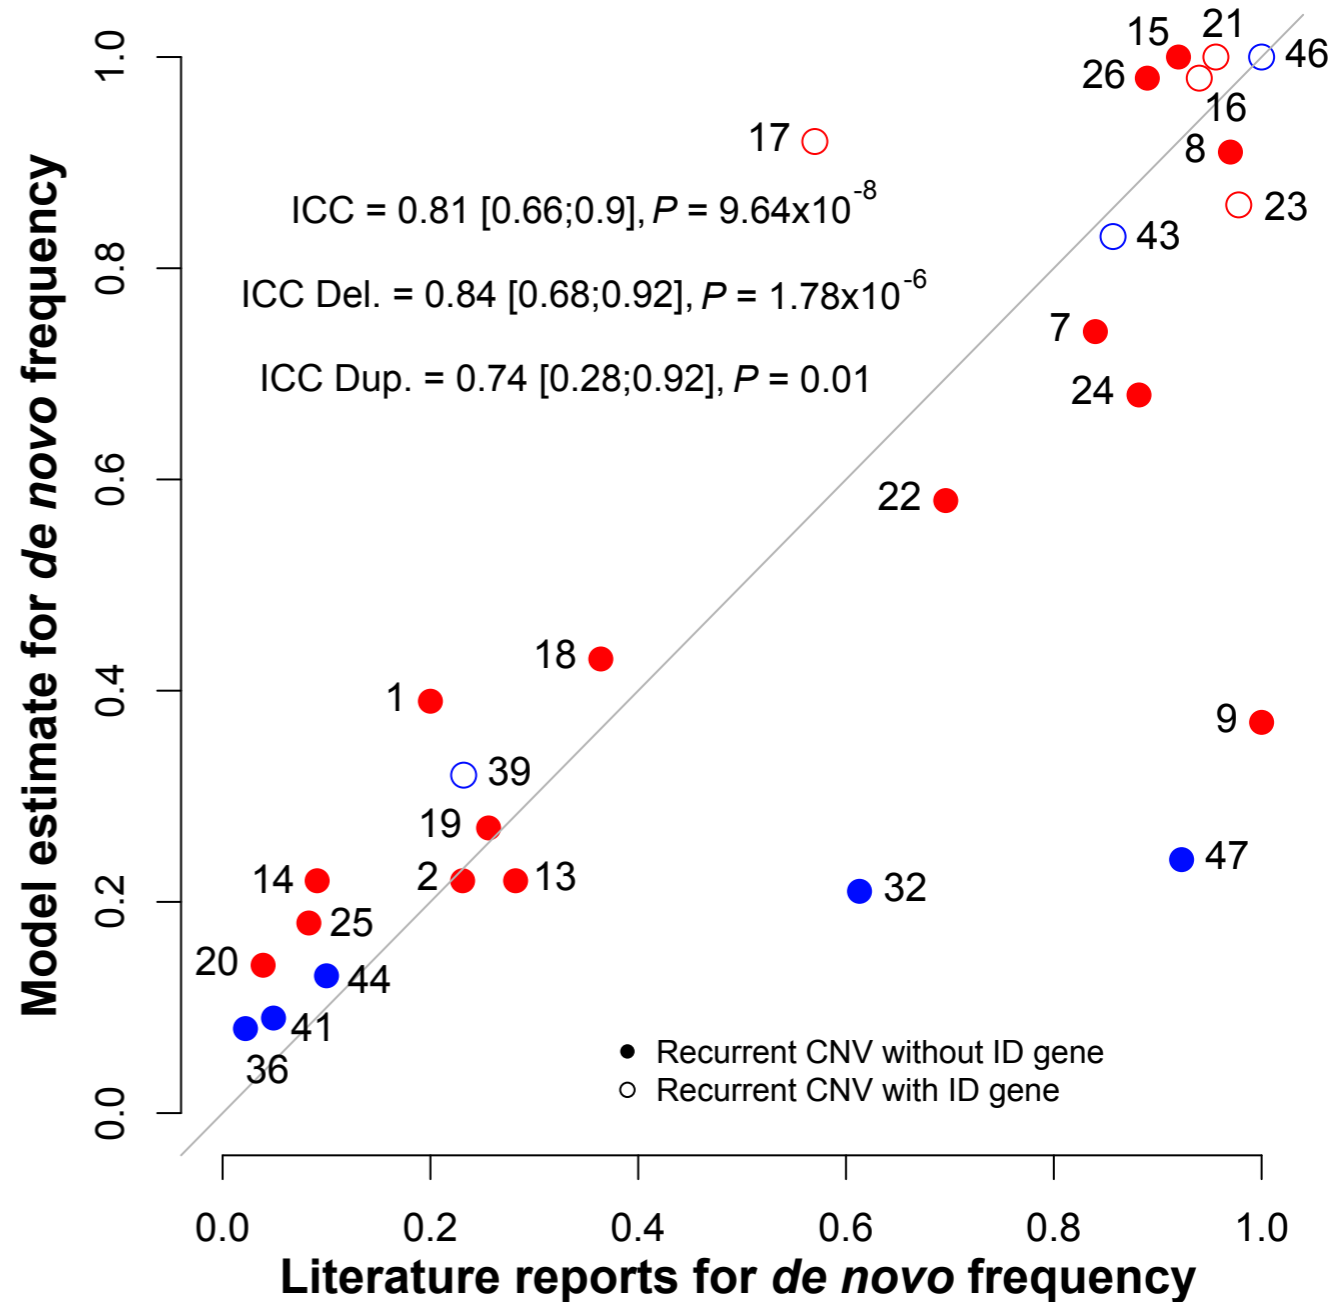

Supplement: NIHMS1668378-supplement-supp_figure_8.pdf [file NIHMS1668378-supplement-supp_figure_8.pdf]

**Effect size of individual genes on z-scores  
of general intelligence with duplication**

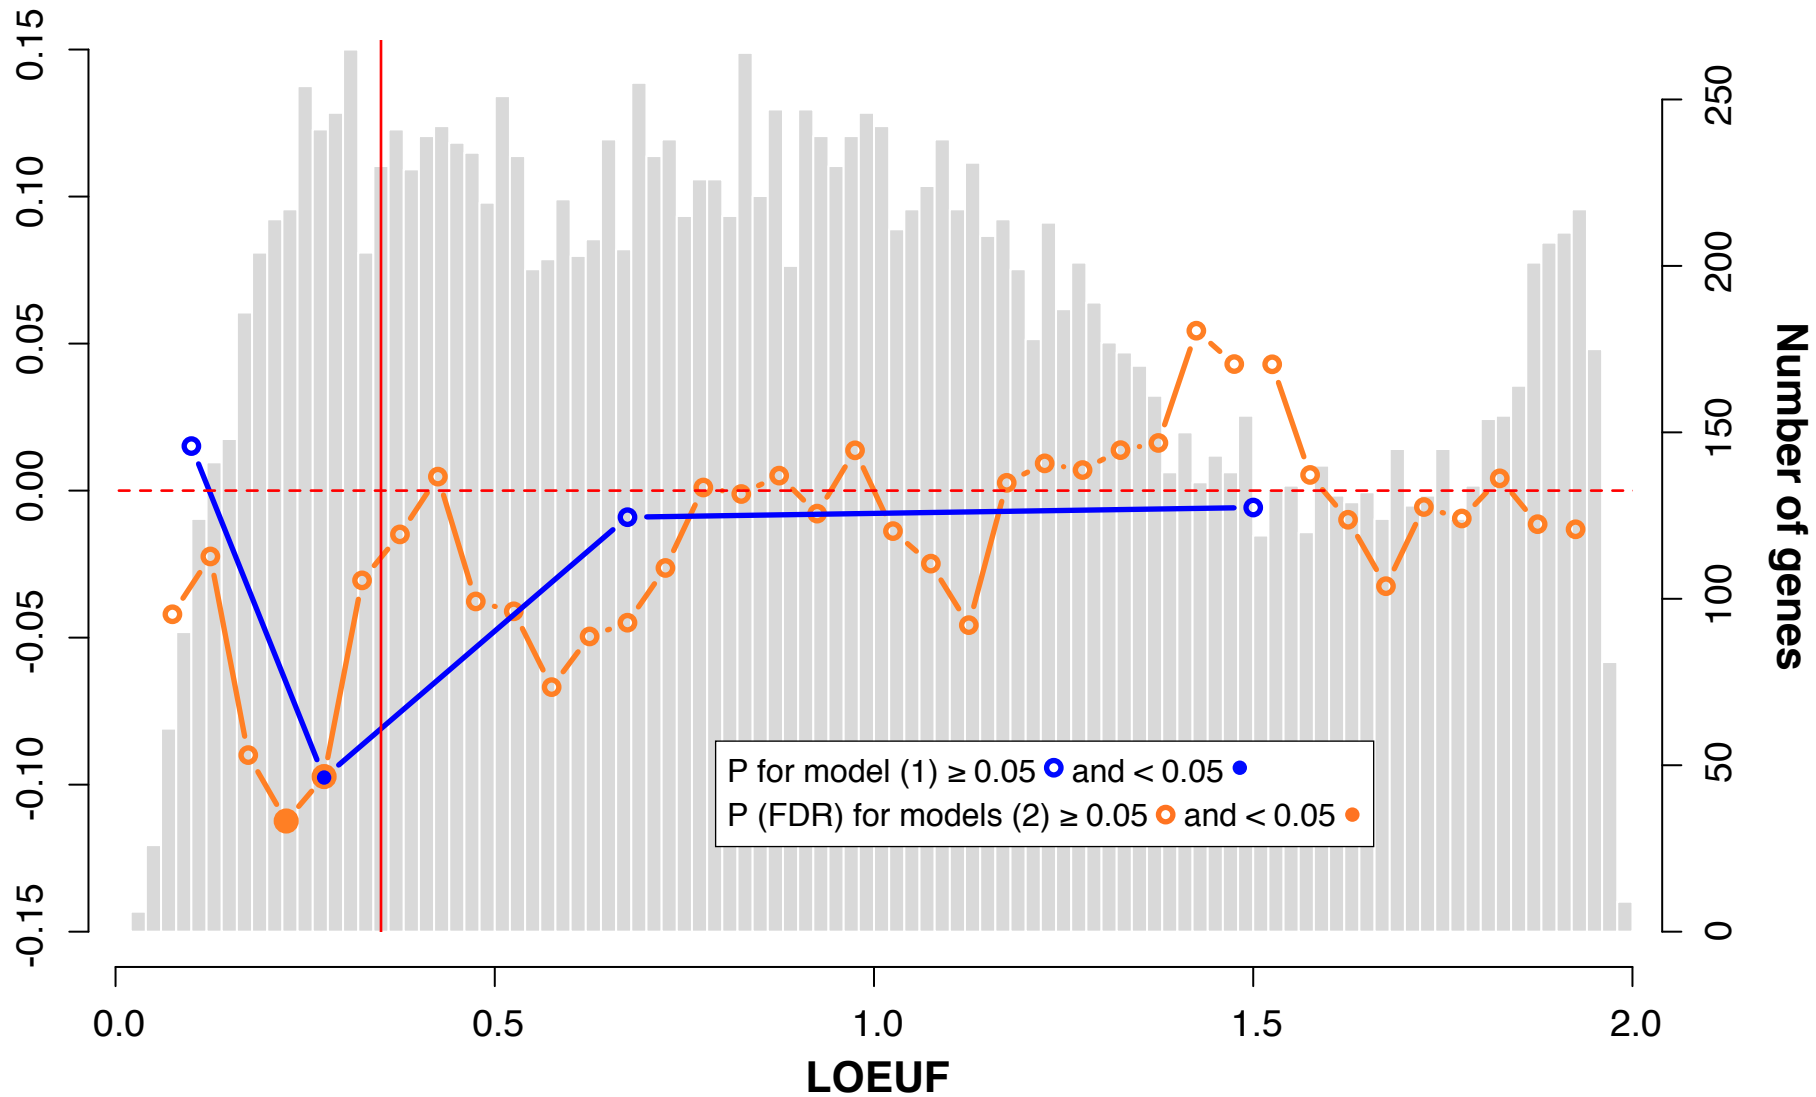

Supplement: NIHMS1668378-supplement-supp_figure_9.pdf [file NIHMS1668378-supplement-supp_figure_9.pdf]
